# Supplementary material for: Within-host evolutionary dynamics of seasonal and pandemic human influenza A viruses in young children
Source: eLife journal article supplement (doi:10.7554/elife.68917), 2021-08-03

Last day of collected sample where  $CT \leq 35$   
(Day(s) since symptom onset)

--- Pearson's  $R$ : 0.42 ( $p=3.10e-04$ )  
● A/H3N2  
● A/H1N1pdm09

16  
14  
12  
10  
8  
6  
4  
2

0

2

4

6

8

First day of Oseltamivir treatment  
(Day(s) since symptom onset)

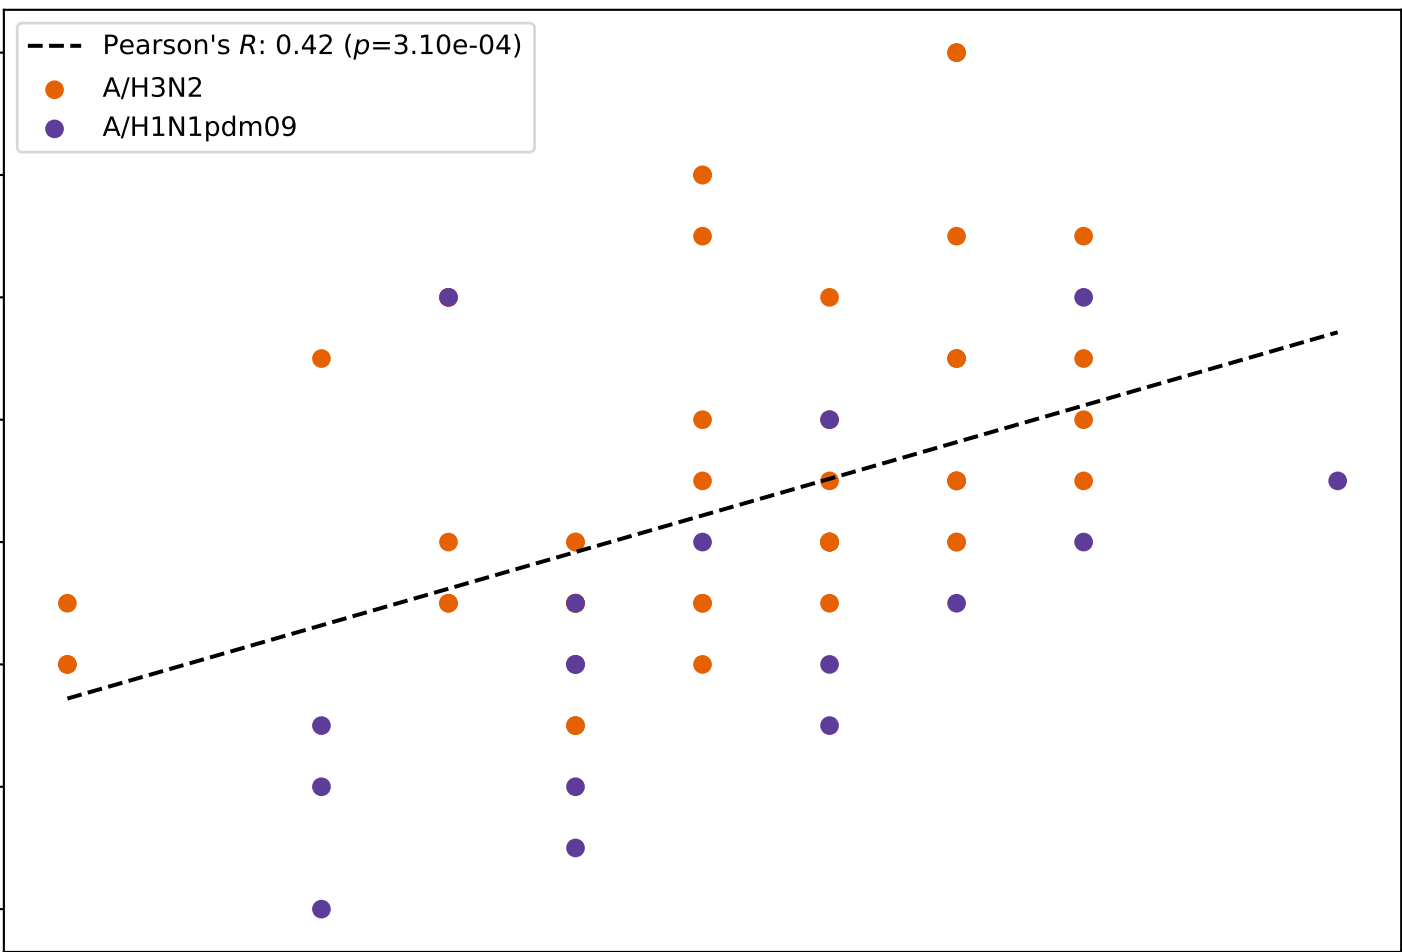

Supplement: supp [file elife_poa_e68917_Figure_1_figure_supplement_5.pdf › elife_poa_e68917_Figure_1_figure_supplement_5.pdf]
