# Supplementary material for: Within-host evolutionary dynamics of seasonal and pandemic human influenza A viruses in young children
Source: eLife. 2021 Aug 3;10:e68917. doi: 10.7554/eLife.68917 (PMC8382297; doi:10.7554/eLife.68917)
Supplement: Supplementary file 1. [file elife-68917-supp1.xlsx]

## Sheet: Sheet1
Table S1: Mean number of nonsynonymous (NS), synonymous (S) and stop codon (Stop) variants per sample for each gene segment as well as the corresponding NS/S ratio.
Subtype	Gene	NS	S	Stop	NS/S
H3N2	1-PB2	4.78	5.59	0.04	0.85
	2-PB1	4.83	7.76	0.13	0.62
	3-PA	4.92	9.77	0.19	0.5
	4-HA	2.37	8.82	0.07	0.27
	5-NP	6.9	4.12	0.06	1.68
	6-NA	5.06	3.9	0.08	1.3
	7-M	3.42	5.11	1.41	0.67
	8-NS	5.75	10.04	1.1	0.57
H1N1pdm09	1-PB2	4.98	3.99	0.12	1.25
	2-PB1	6.47	3.41	0.06	1.9
	3-PA	5.26	4.13	0.15	1.27
	4-HA	8.62	2.82	0	3.06
	5-NP	4.92	4.07	0.11	1.21
	6-NA	4.23	4.91	0.23	0.86
	7-M	5.83	0.74	0.16	7.86
	8-NS	6.53	3.61	0	1.81
