# Supplementary material for: Within-host evolutionary dynamics of seasonal and pandemic human influenza A viruses in young children
Source: eLife. 2021 Aug 3;10:e68917. doi: 10.7554/eLife.68917 (PMC8382297; doi:10.7554/eLife.68917)
Supplement: Supplementary file 2. — Sample names are given in the format of 'Patient ID_Days since symptom onset.' Both linkage disequilibrium (LD) and the normalized LD' measures are tabulated alongside the inferred maximum-likelihood haplotype frequencies (q10 and q01 are the haplotype frequencies with variant i or ii only while q11 is the frequency of haplotypes encoding both variants). [file elife-68917-supp2.xlsx]

## Sheet: Sheet1
Table S2: Potentially linked nonsynonymous variants in within-host A/H1N1pdm09 and A/H3N2 virus samples. Sample names are given in the format of “Patient ID_Days since symptom onset”. Both linkage disequilibrium (LD) and the normalized LD' measures are tabulated alongside the inferred maximum-likelihood haplotype frequencies (q_10 and q_01 are the haplotype frequencies with variant i or ii only w…
Subtype	Protein	Sample	Variant
H1N1pdm09	PB2	11-1015_D0	i. S286G	0.04	1	0	0	0.04
			ii. E343K
	HA	H160/S05_D7	E261G	0.04	0.3	0.34	0.08	0.15
			L455F
	NP	H053/S04_D8	S314N	0.08	1	0	0.02	0.09
			L358P
	NA	H160/S05_D6	N386D	0.1	1	0	0	0.12
			I389M
	M1	H160/S05_D7	L130P	0.03	1	0	0	0.03
			G228D
	M2	HCMC-1889_D0	L46P	0.16	1	0	0.04	0.21
			F48S
H3N2	PB2	1219_D7	I615V	0.02	1	0.41	0	0.03
			S684F
	PB1	3611_D10	K211R	0.07	1	0	0.3	0.11
			E78K
	PA	1224_D10	E493G	0.03	1	0	0	0.03
			F562S
		1691_D10	K309R	0.06	1	0	0.27	0.09
			R385I
	PA/PA-X	3612_D7	L175M	0.07	1	0	0.27	0.11
			V201L
	NP	1224_D10	G384R	0.05	1	0.34	0	0.08
			M426I
		1686_D8	G384R	0.08	1	0	0.25	0.13
			G102R
		1867_D7	V197I	0.08	1	0.31	0	0.16
			S353Y
		3615_D13	G384R	0.02	1	0.39	0	0.03
			A493T
	NS1	3615_D7	R41G	0.02	1	0	0.42	0.04
			E179G
		3615_D7	H59L	0.02	1	0	0.43	0.03
			E179G
		3611_D10	V174A	0.04	1	0	0.01	0.04
			T215S
	NEP	3611_D10	S22P	0.04	1	0	0.01	0.04
			L63V
