# Supplementary material for: Within-host evolutionary dynamics of seasonal and pandemic human influenza A viruses in young children
Source: eLife. 2021 Aug 3;10:e68917. doi: 10.7554/eLife.68917 (PMC8382297; doi:10.7554/eLife.68917)
Supplement: Supplementary file 3. [file elife-68917-supp3.xlsx]

## Sheet: Sheet1
Table S3: A/H3N2 segment-specific primers
			Nucleotide coordinates
Gene	Amplicon	Sequence	Start	End
1-PB2	1-F	AGCRAAAGCAGGTCAATTATATTCAG	-26	0
	1-R	GGTTCTGTCTAAGAATGTCCAC	883	905
	2-F	ATTTCTCCCTTGATGGTTGCATAC	592	616
	2-R	GACTCAGGACCGTTAATCTCC	1611	1632
	3-F	GGTGTTTTCACAAGARGATTGC	1206	1229
	3-R	AGTAGAAACAAGGTCGTTTTTAAAC	2290	2315
2-PB1	1-F	AGCRAAAGCAGGCAAACCATTT	-23	-1
	1-R	GCGATGCTCAGGATGTTTCTG	999	1020
	2-F	ATGGTCACACAAAGAACAATAGG	595	618
	2-R	CTGGTCCAAGGTCATTGTTTATC	1602	1625
	3-F	AGCCCTGGRATGATGATGG	1210	1229
	3-R	GACCAGTAGAAACAAGGCATT	2301	2322
3-PA	1-F	AGCRAAAGCAGGTACTGATTC	-23	-2
	1-R	GTGACTTGGGTCTTCAATGCTC	870	892
	2-F	GGGATTCCTTTCGTCAGTCC	563	583
	2-R	CTCAAGGACACAGTATTTCTCC	1611	1633
	3-F	GGCTCTTGGTGAAAACATGGC	1104	1125
	3-R	GGATAACAAATAGTAGCACTGCC	2154	2177
4-HA	1-F	AGCRAAAGCAGGGGATAATTCTATTAA	-28	-1
	1-R	CATTCCCTCCCAACCATTTTCTATG	1062	1087
	2-F	CTCTATTGGGAGACCCTCAG	254	274
	2-R	TCCTCAACATATTTCTCRAGGTCC	1269	1293
	3-F	GACAATAGTAAAACCGGGAGAC	750	772
	3-R	GACCAGTAGAAACAAGGGTG	1717	1737
5-NP	1-F	AGCRAAAGCAGGGTAGATAATCACTC	-44	-18
	1-R	CTTCAAATGCAGCAGAATGGC	998	1019
	2-F	ATGGATCCCAGAATGTGCTCTC	475	497
	2-R	CAGTAGAAACAAGGGTATTTTTCC	1499	1523
	3-F	TGAGGGAACTCGTCCTTTATG	314	335
	3-R	TTATGGCCCAGTACCCGCTTC	1145	1166
6-NA	1-F	AGCRAAAGCAGGAGTAAAGATG	-19	3
	1-R	GTGTCTCCAACAAGTCCTG	956	975
	2-F	GCATGGTCCAGCTCAAGTTG	529	549
	2-R	GACCAGTAGAAACAAGGAGTT	1431	1452
	3-F	GTGACAAGAGAACCTTATGTGTC	346	369
	3-R	AGAAAATACCAGAATAACCGGACC	1208	1232
7-M	1-F	AGCRAAAGCAGGTAGATATTGAAAG	-24	1
	1-R	GACCAGTAGAAACAAGGTAG	987	1007
8-NS	1-F	AGCRAAAGCAGGGTGACAAAGAC	-25	-2
	1-R	GACCAGTAGAAACAAGGGTG	849	869
