# Supplementary material for: Within-host evolutionary dynamics of seasonal and pandemic human influenza A viruses in young children
Source: eLife. 2021 Aug 3;10:e68917. doi: 10.7554/eLife.68917 (PMC8382297; doi:10.7554/eLife.68917)
Supplement: Supplementary file 5. [file elife-68917-supp5.xlsx]

## Sheet: Sheet1
Table S5: Acknowledgement table of reference sequences downloaded from GISAID.
Isolate-ID	Isolate name	Country	Collection date	Originating Lab	Submitting Lab	Authors
EPI_ISL_103644	A/BRISBANE/10/2007	Australia	2007-Feb-06	Queensland Health Forensic and Scientific Services	WHO Collaborating Centre for Reference and Research on Influenza	Iannello,P; Komadina,N
EPI_ISL_376192	A/California/04/2009	United States	2009-Jan-01		Import from public-domain	Dpcc,C.D.
