# Supplementary figures and images for: Within-host evolutionary dynamics of seasonal and pandemic human influenza A viruses in young children
Source: eLife journal article supplement (doi:10.7554/elife.68917), 2021-08-03

**A**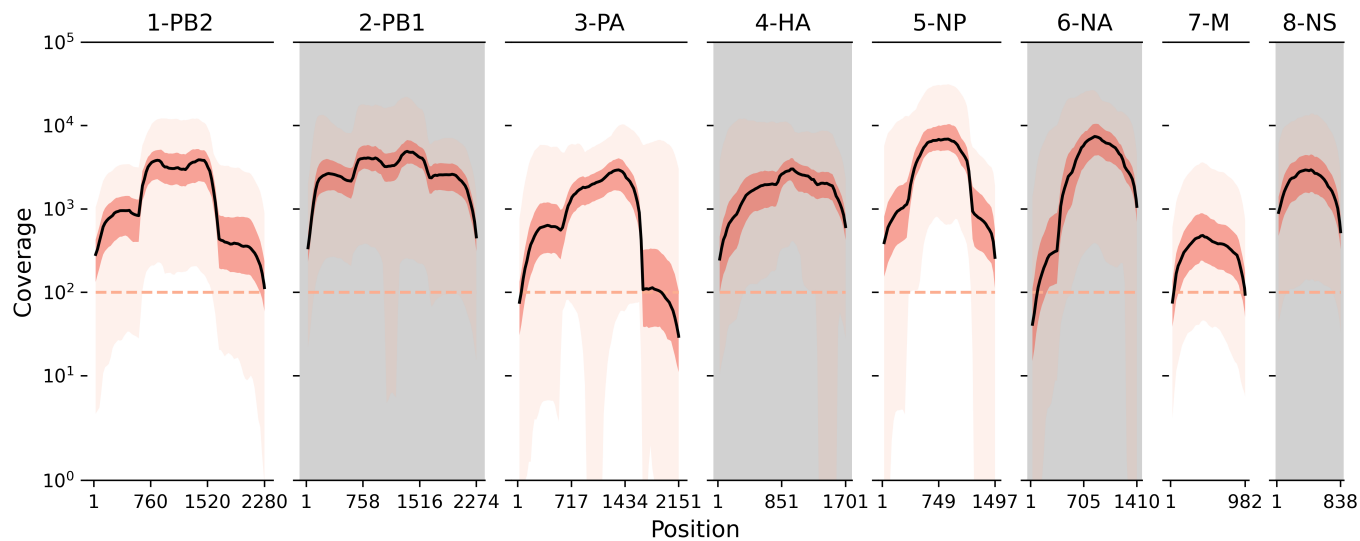**B**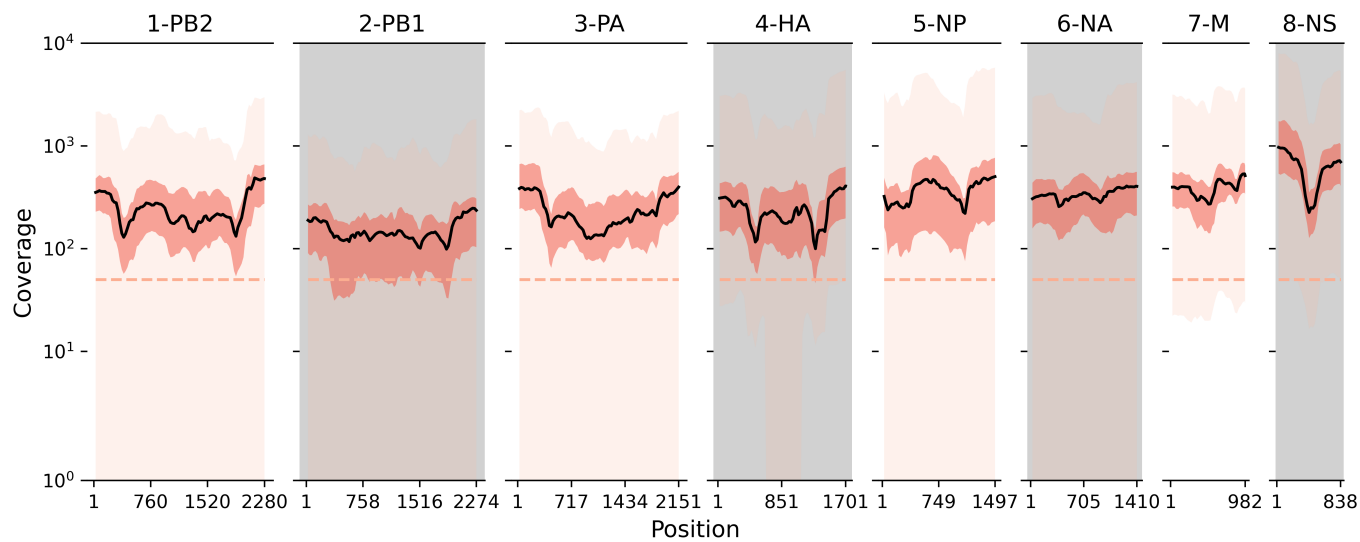

Supplement: supp [file elife_poa_e68917_Figure_1_figure_supplement_1.pdf › elife_poa_e68917_Figure_1_figure_supplement_1.pdf]

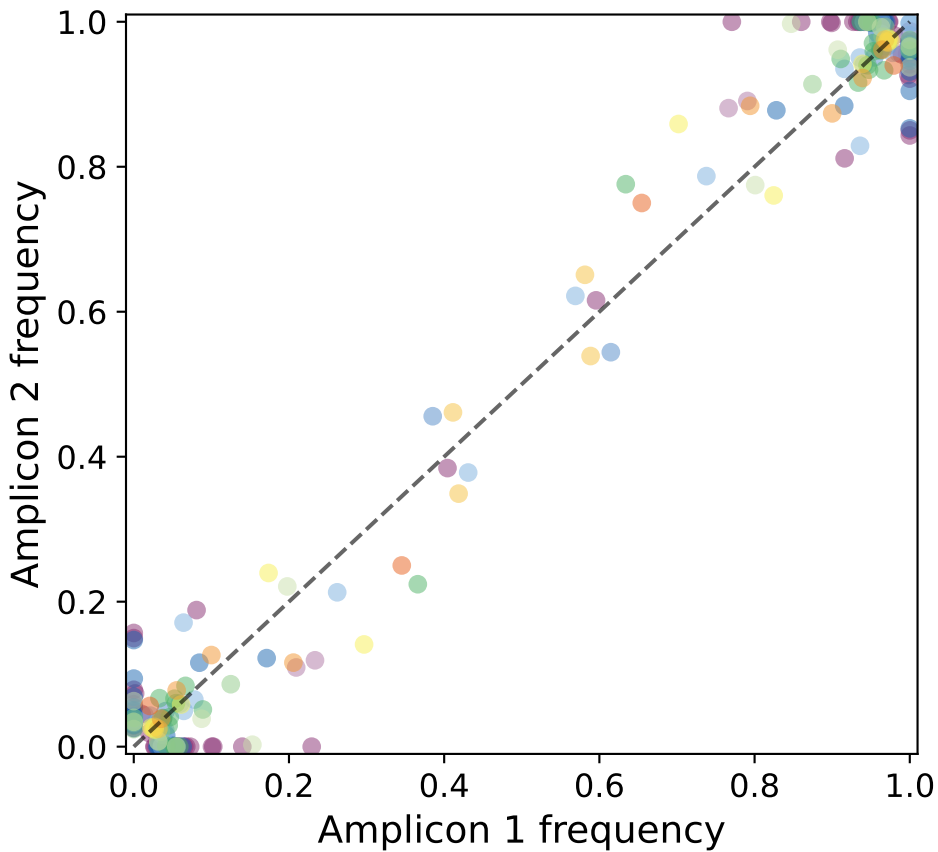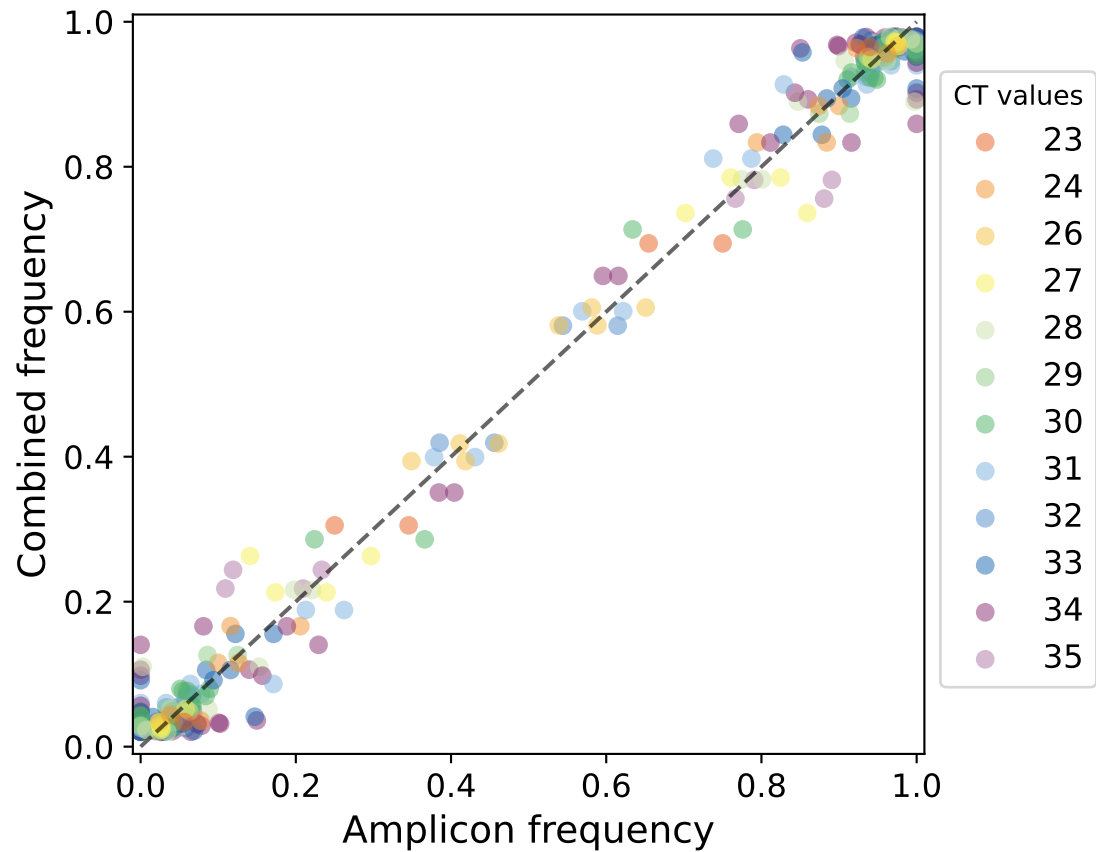

Supplement: supp [file elife_poa_e68917_Figure_1_figure_supplement_2.pdf › elife_poa_e68917_Figure_1_figure_supplement_2.pdf]

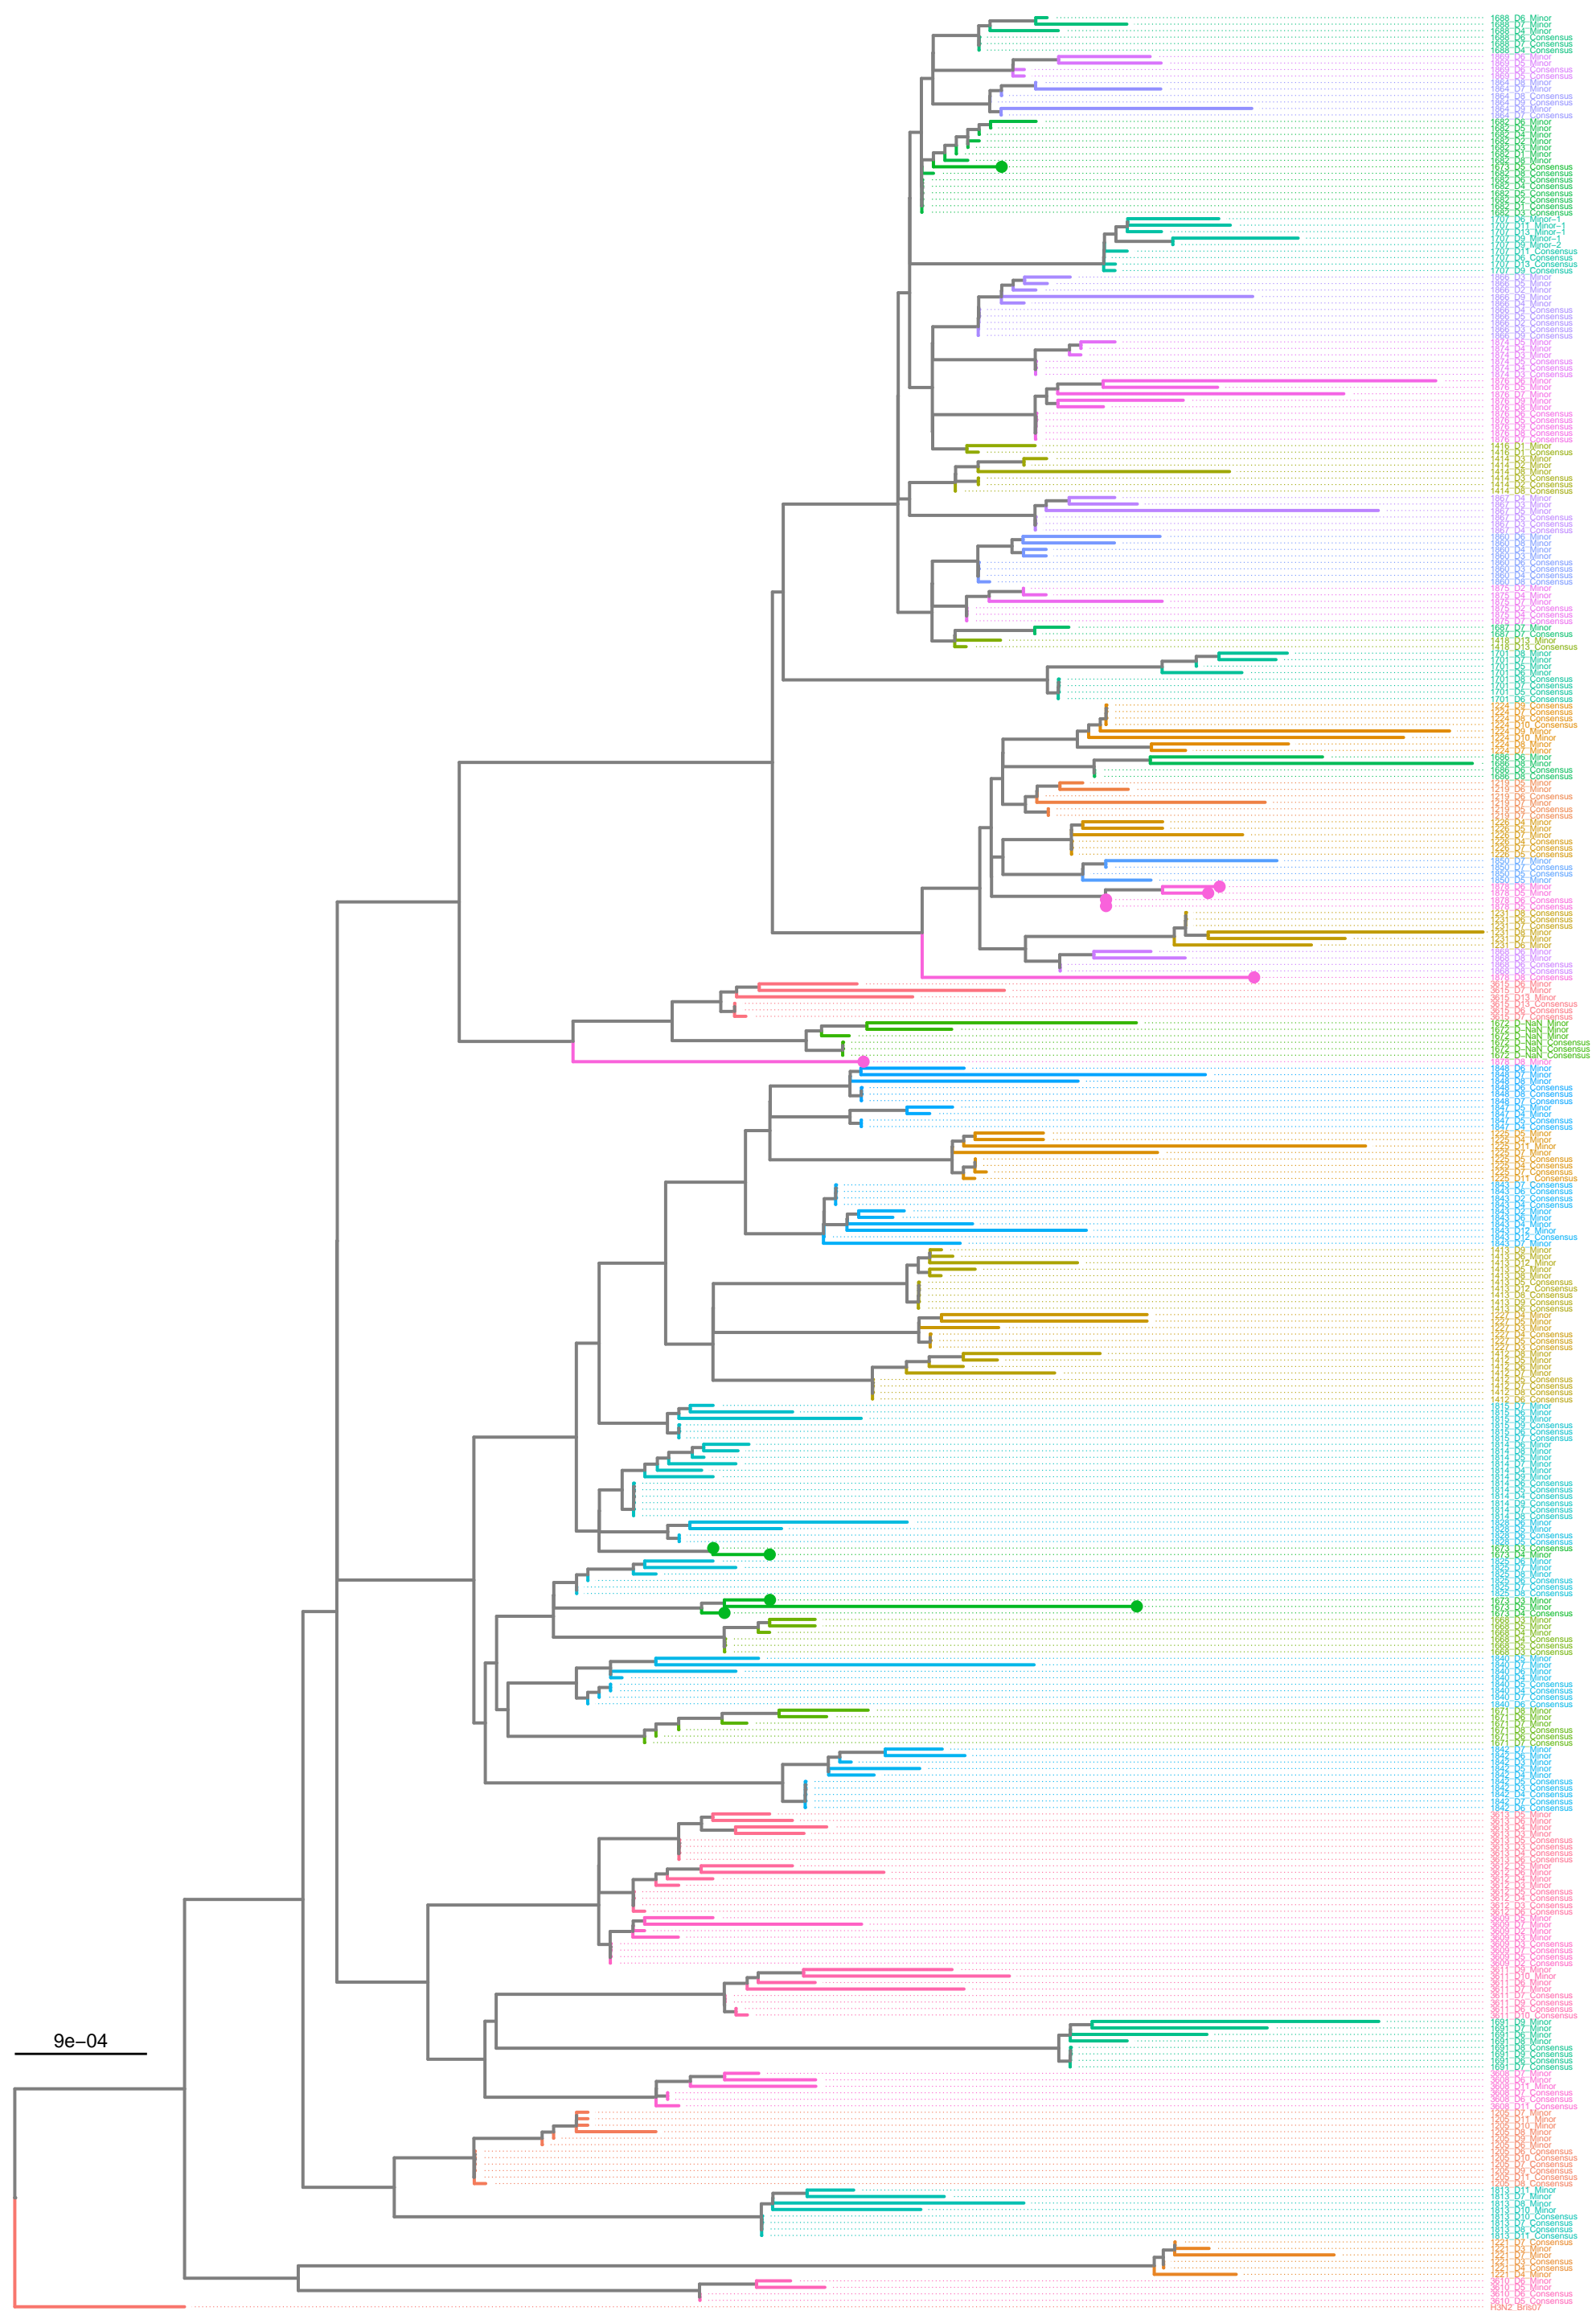

Supplement: supp [file elife_poa_e68917_Figure_1_figure_supplement_3.pdf › elife_poa_e68917_Figure_1_figure_supplement_3.pdf]

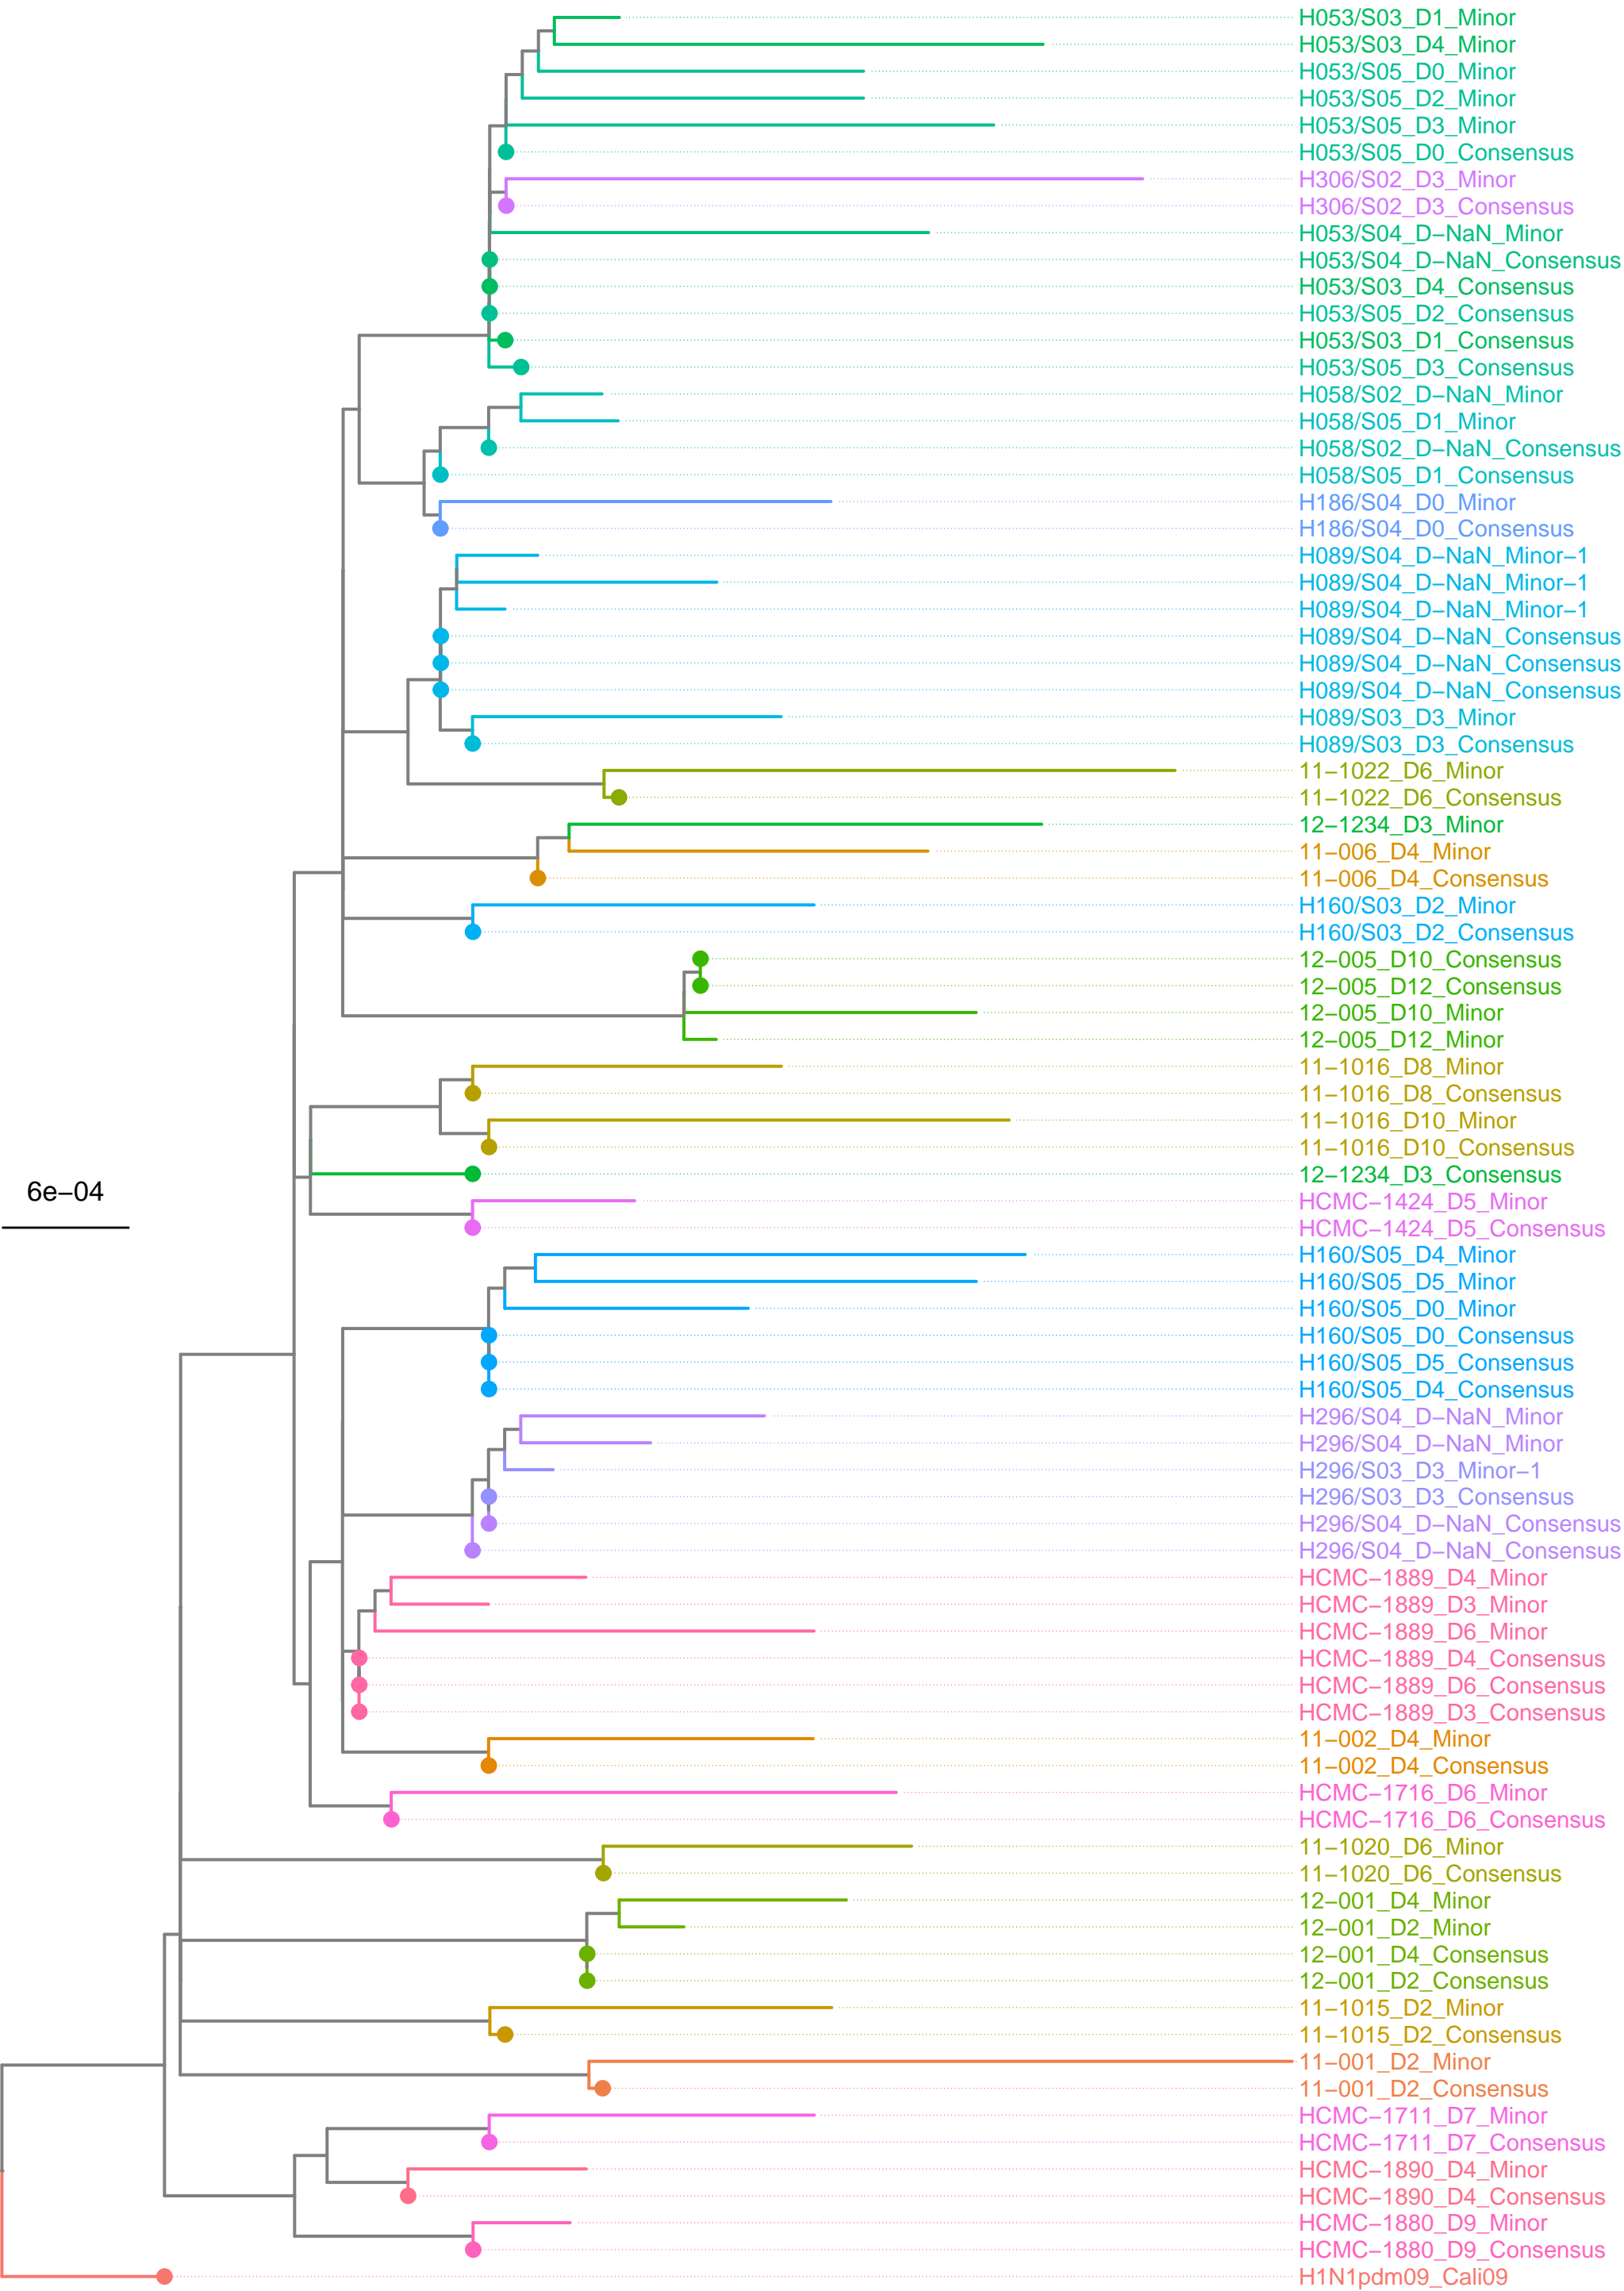

Supplement: supp [file elife_poa_e68917_Figure_1_figure_supplement_4.pdf › elife_poa_e68917_Figure_1_figure_supplement_4.pdf]

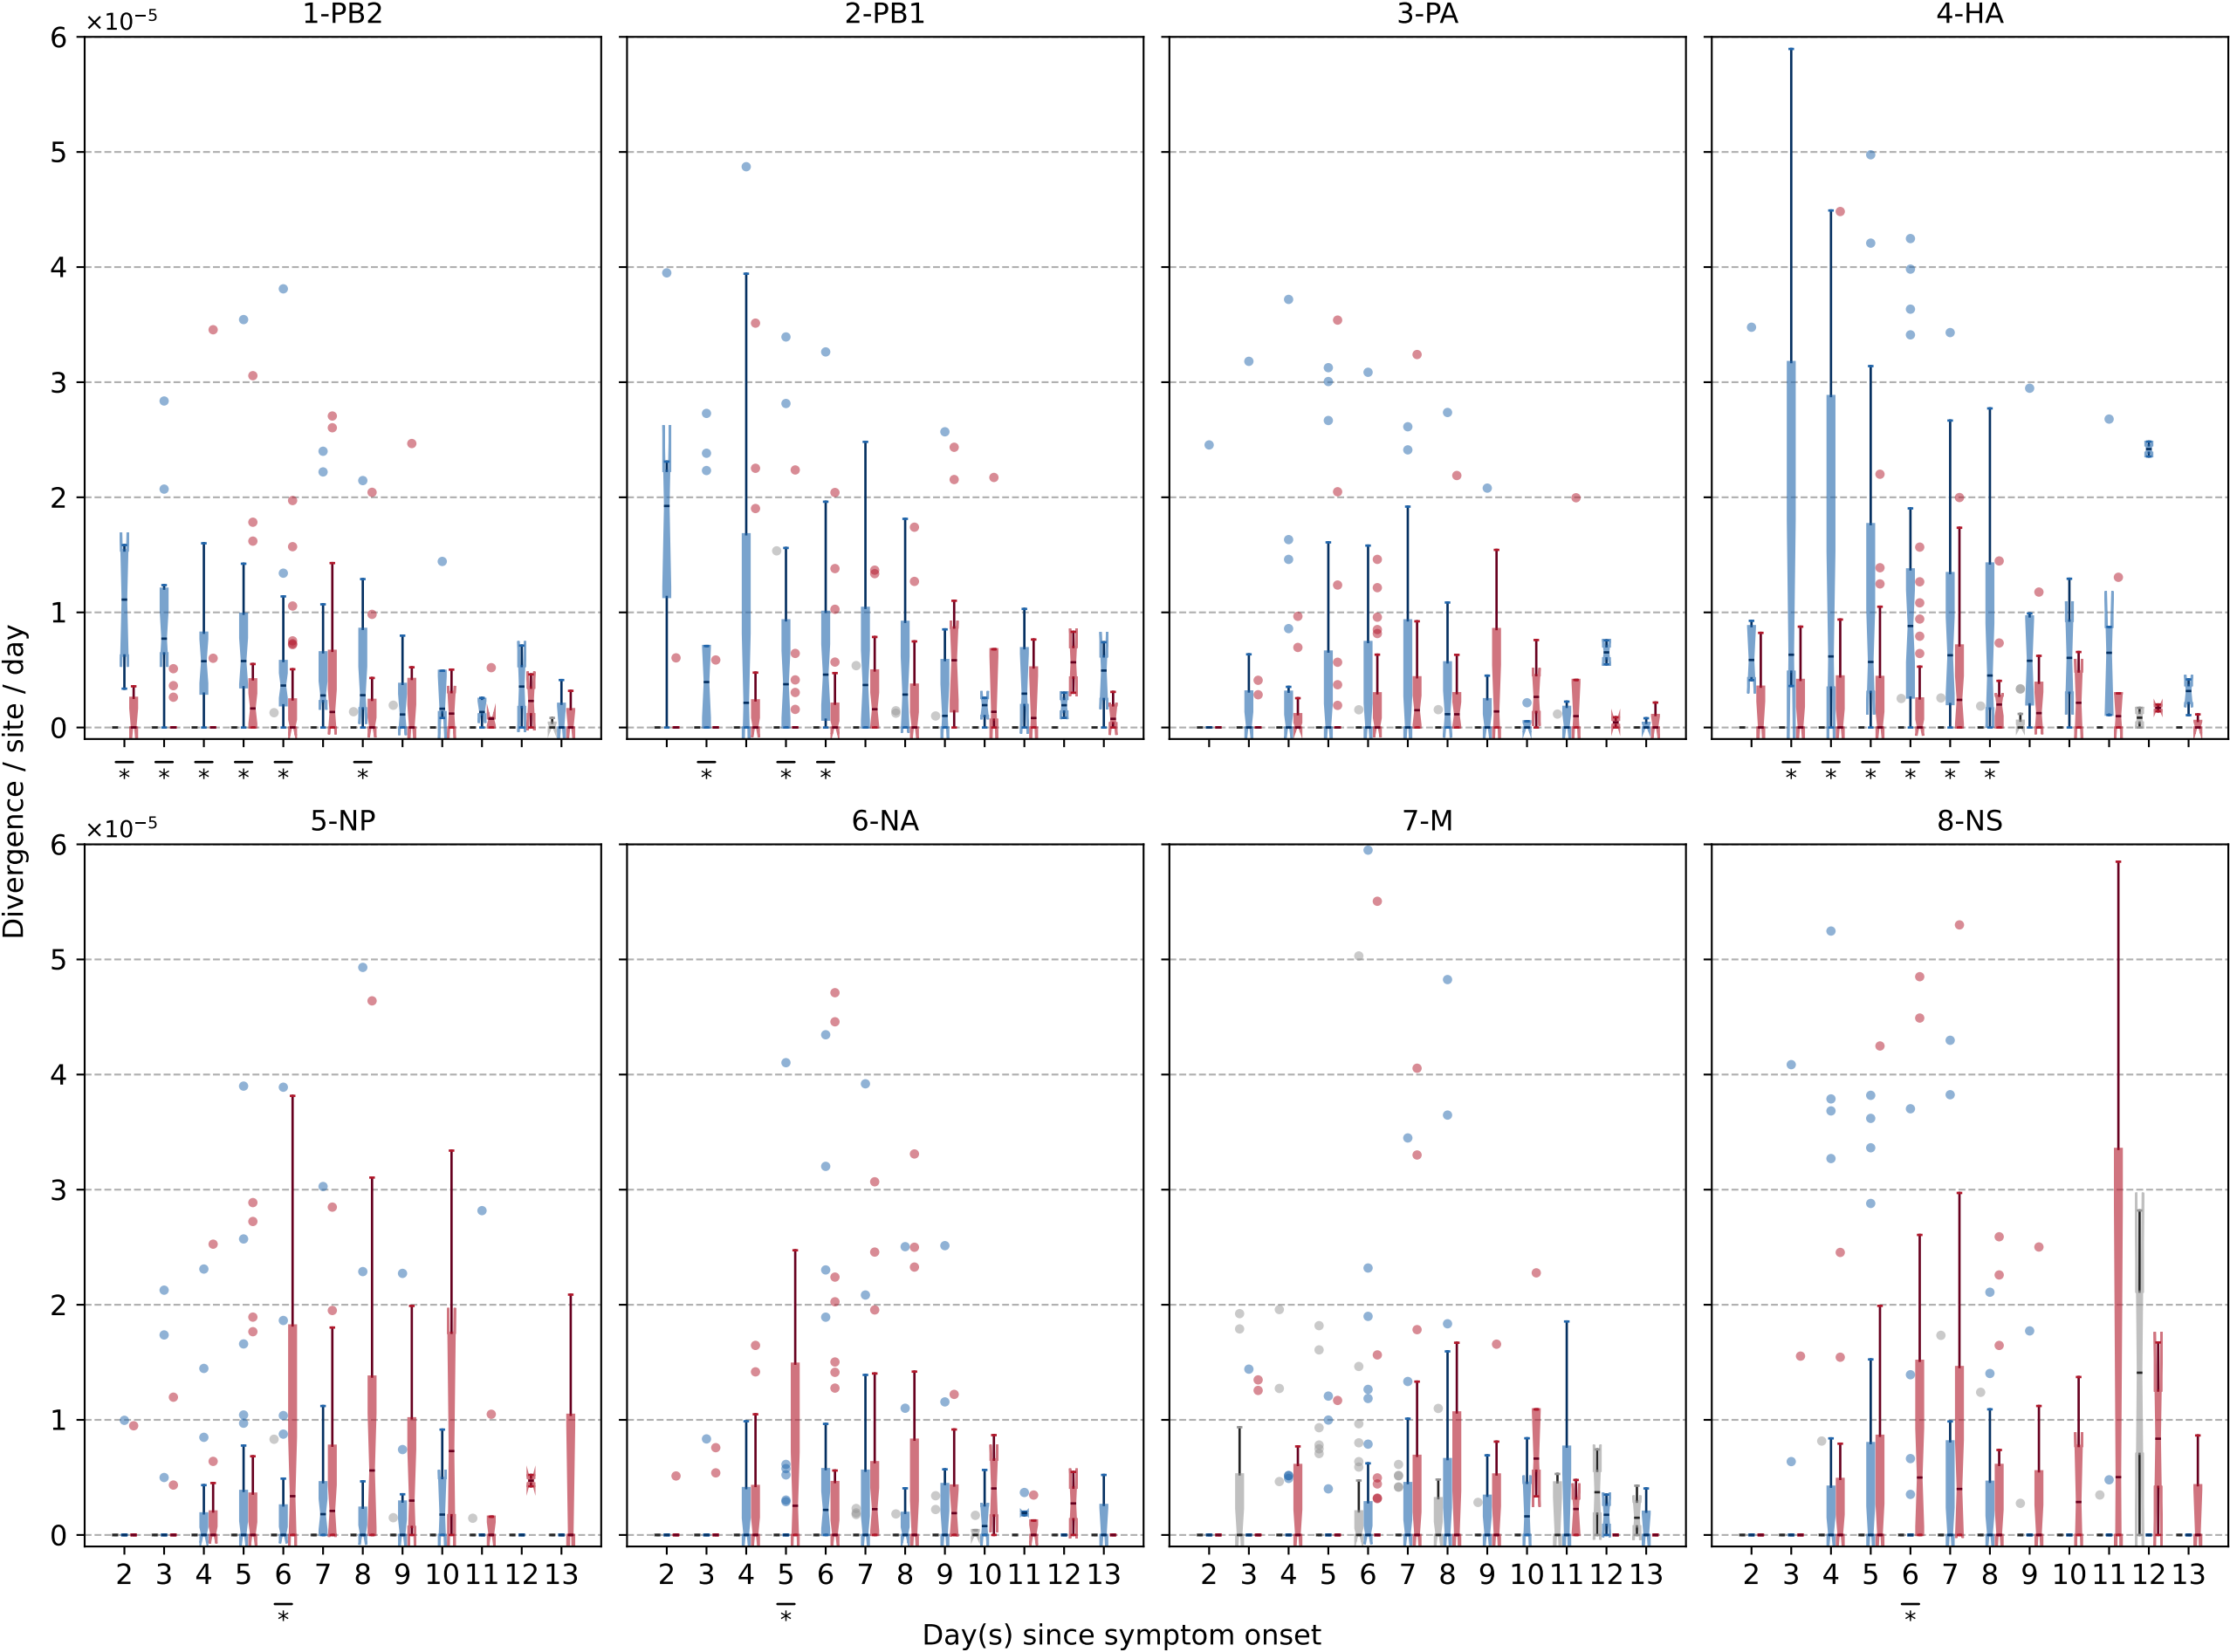

Supplement: supp [file elife_poa_e68917_Figure_2_figure_supplement_1.pdf › elife_poa_e68917_Figure_2_figure_supplement_1.pdf]

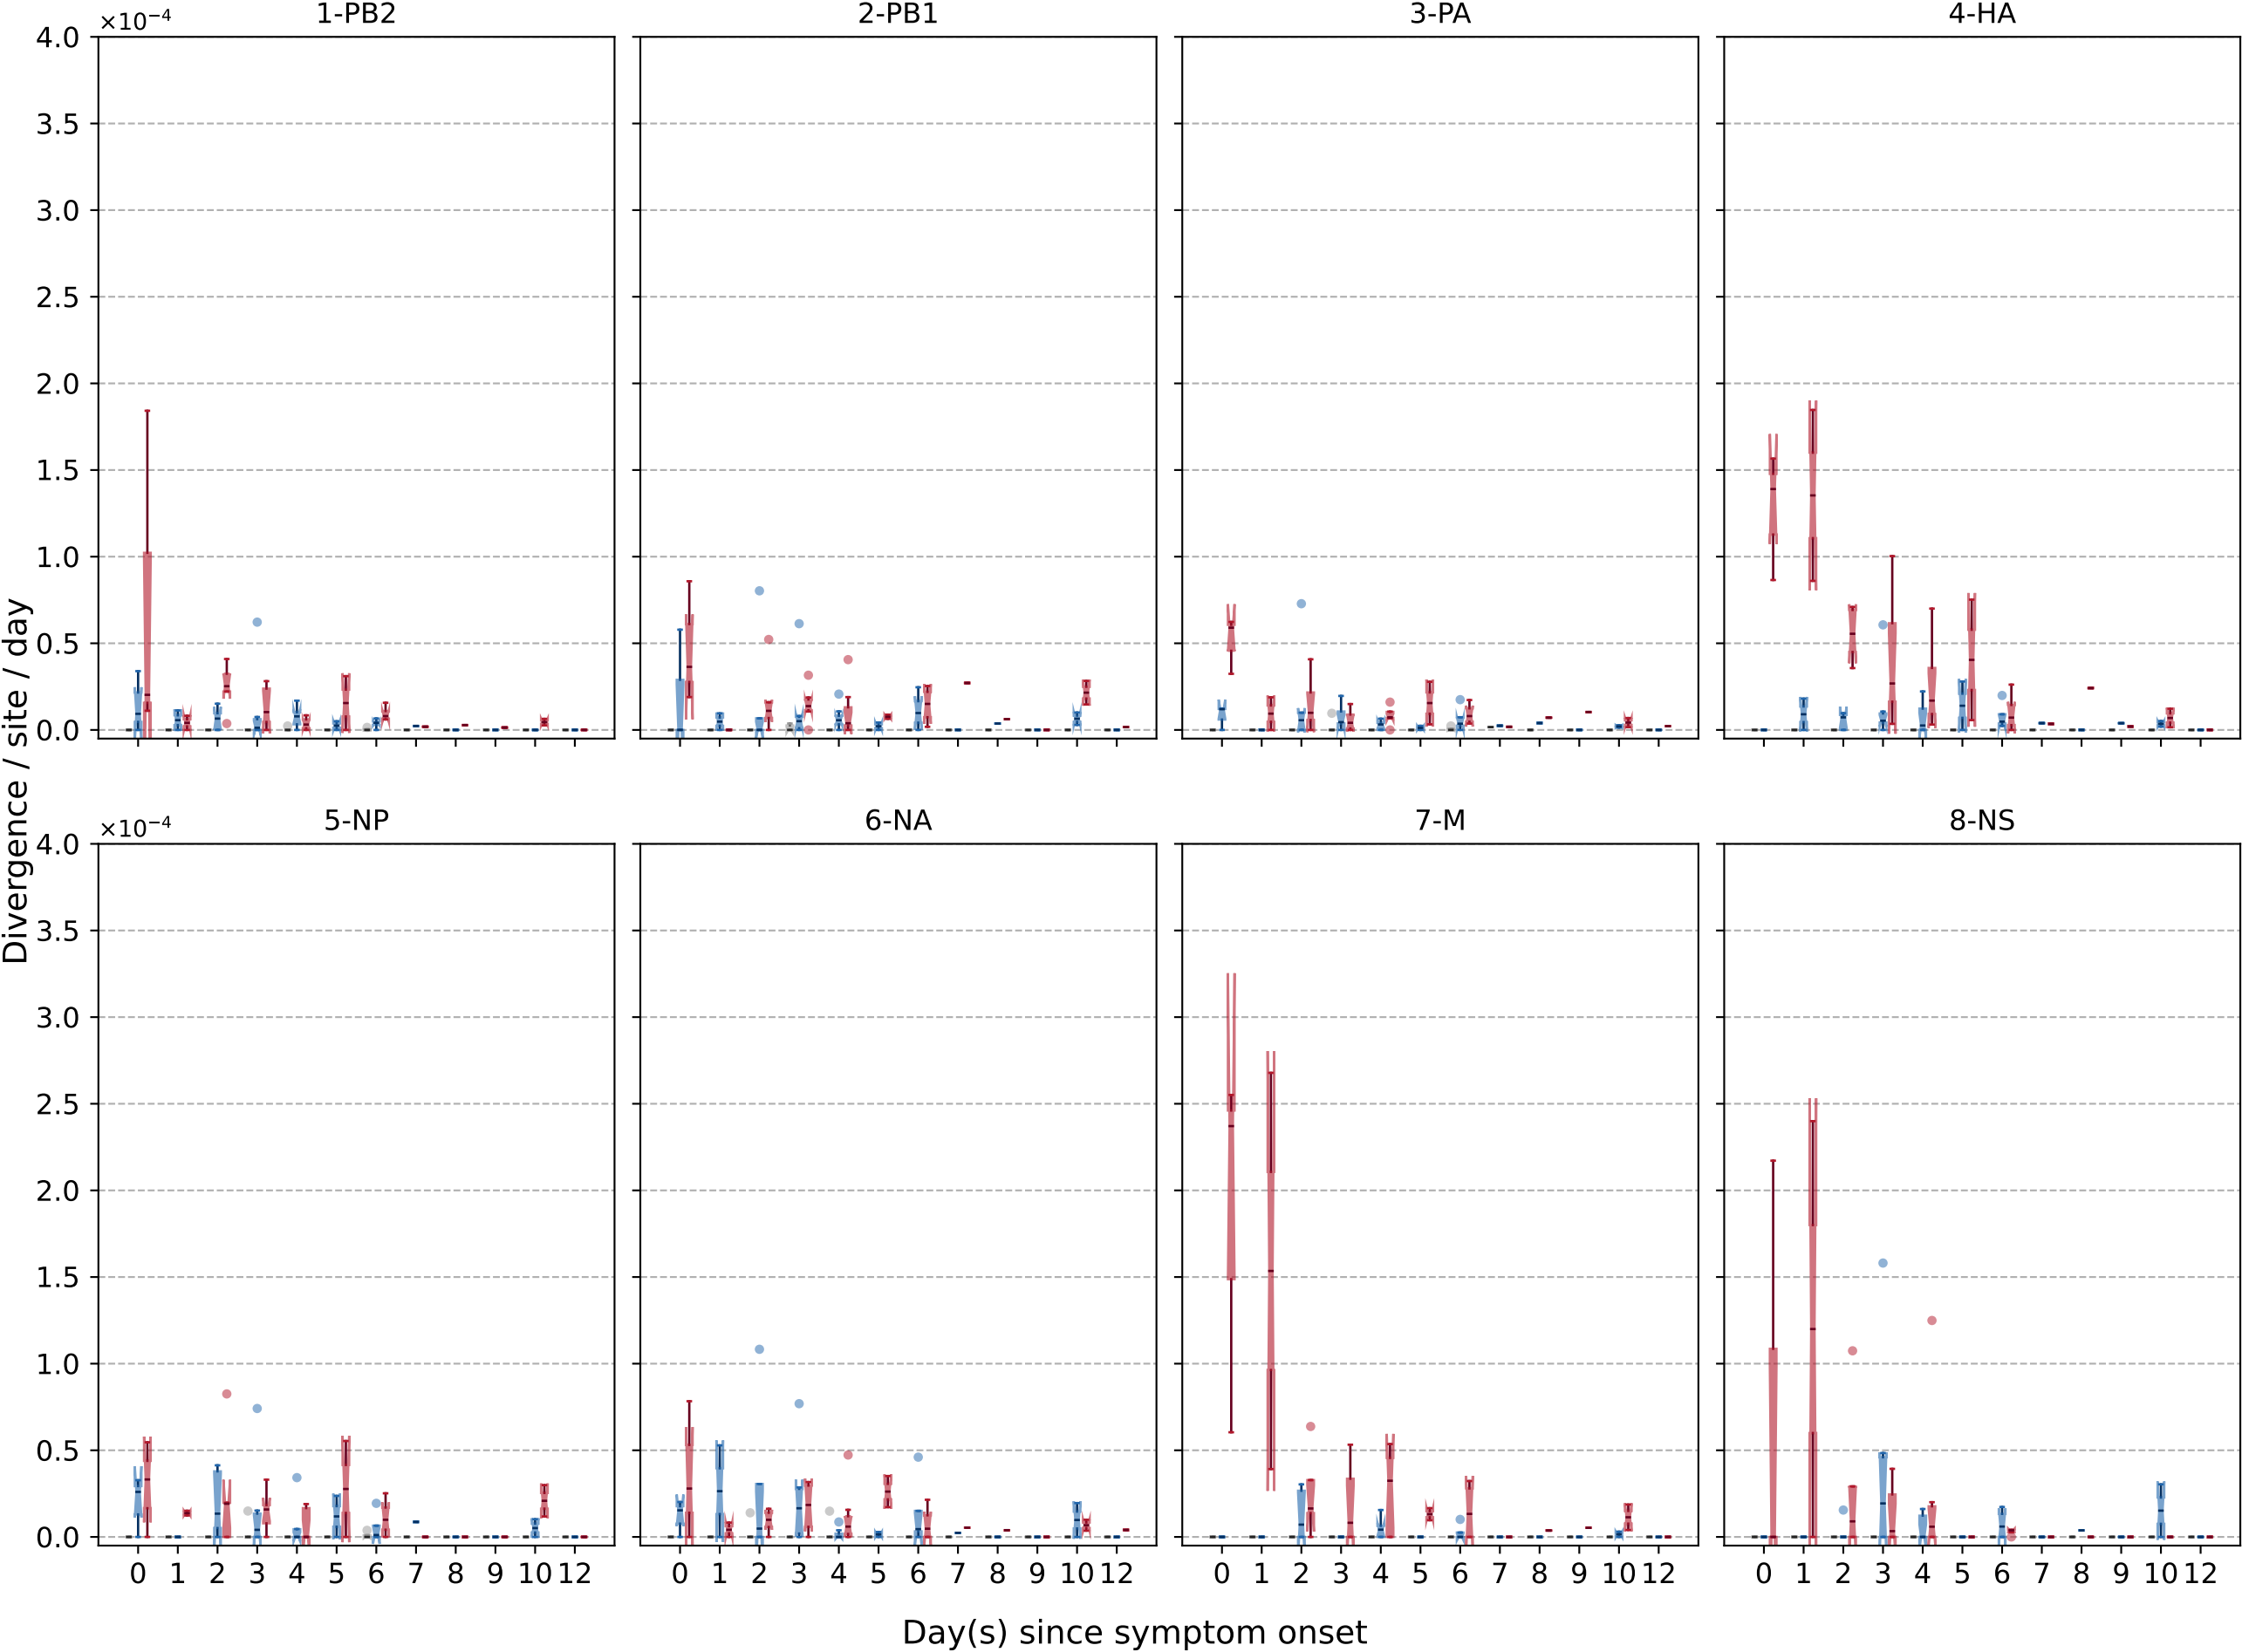

Supplement: supp [file elife_poa_e68917_Figure_2_figure_supplement_2.pdf › elife_poa_e68917_Figure_2_figure_supplement_2.pdf]

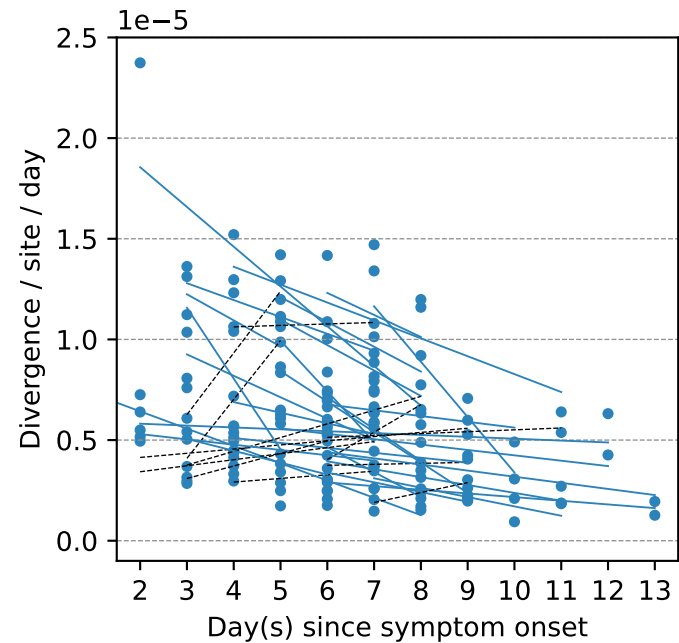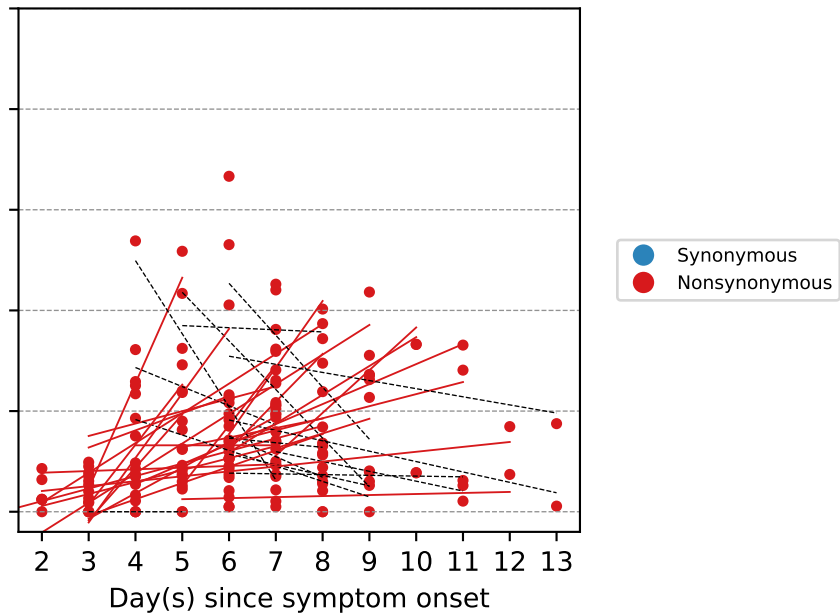

Supplement: supp [file elife_poa_e68917_Figure_2_figure_supplement_3.pdf › elife_poa_e68917_Figure_2_figure_supplement_3.pdf]

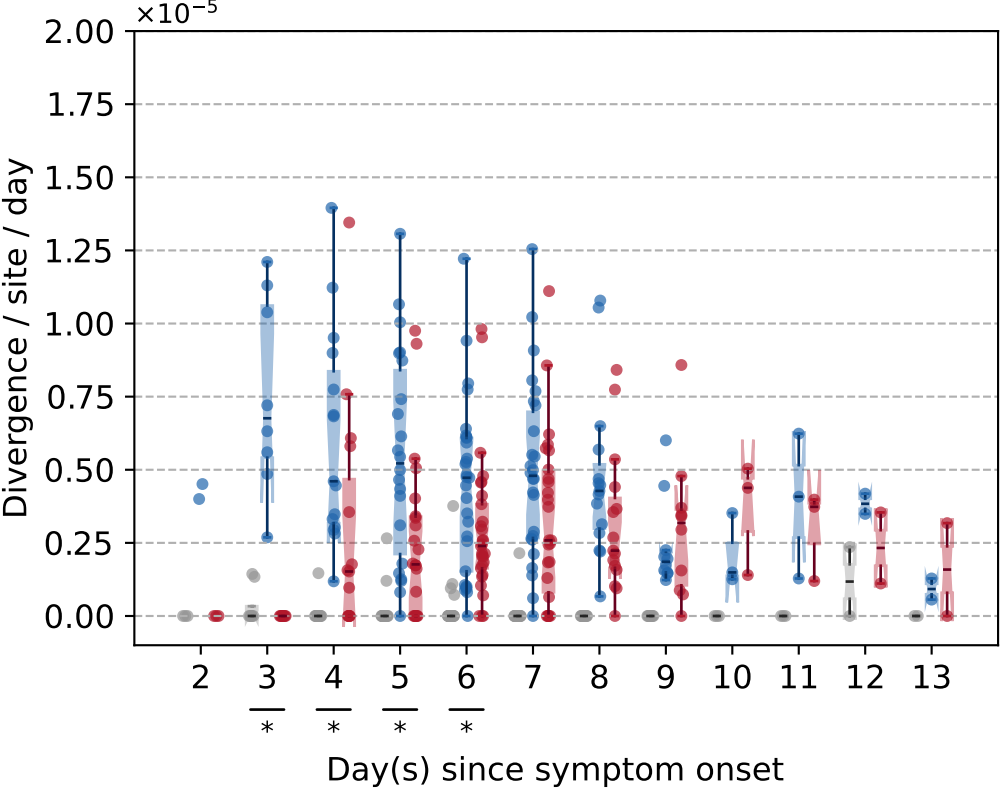

Supplement: supp [file elife_poa_e68917_Figure_2_figure_supplement_4.pdf › elife_poa_e68917_Figure_2_figure_supplement_4.pdf]

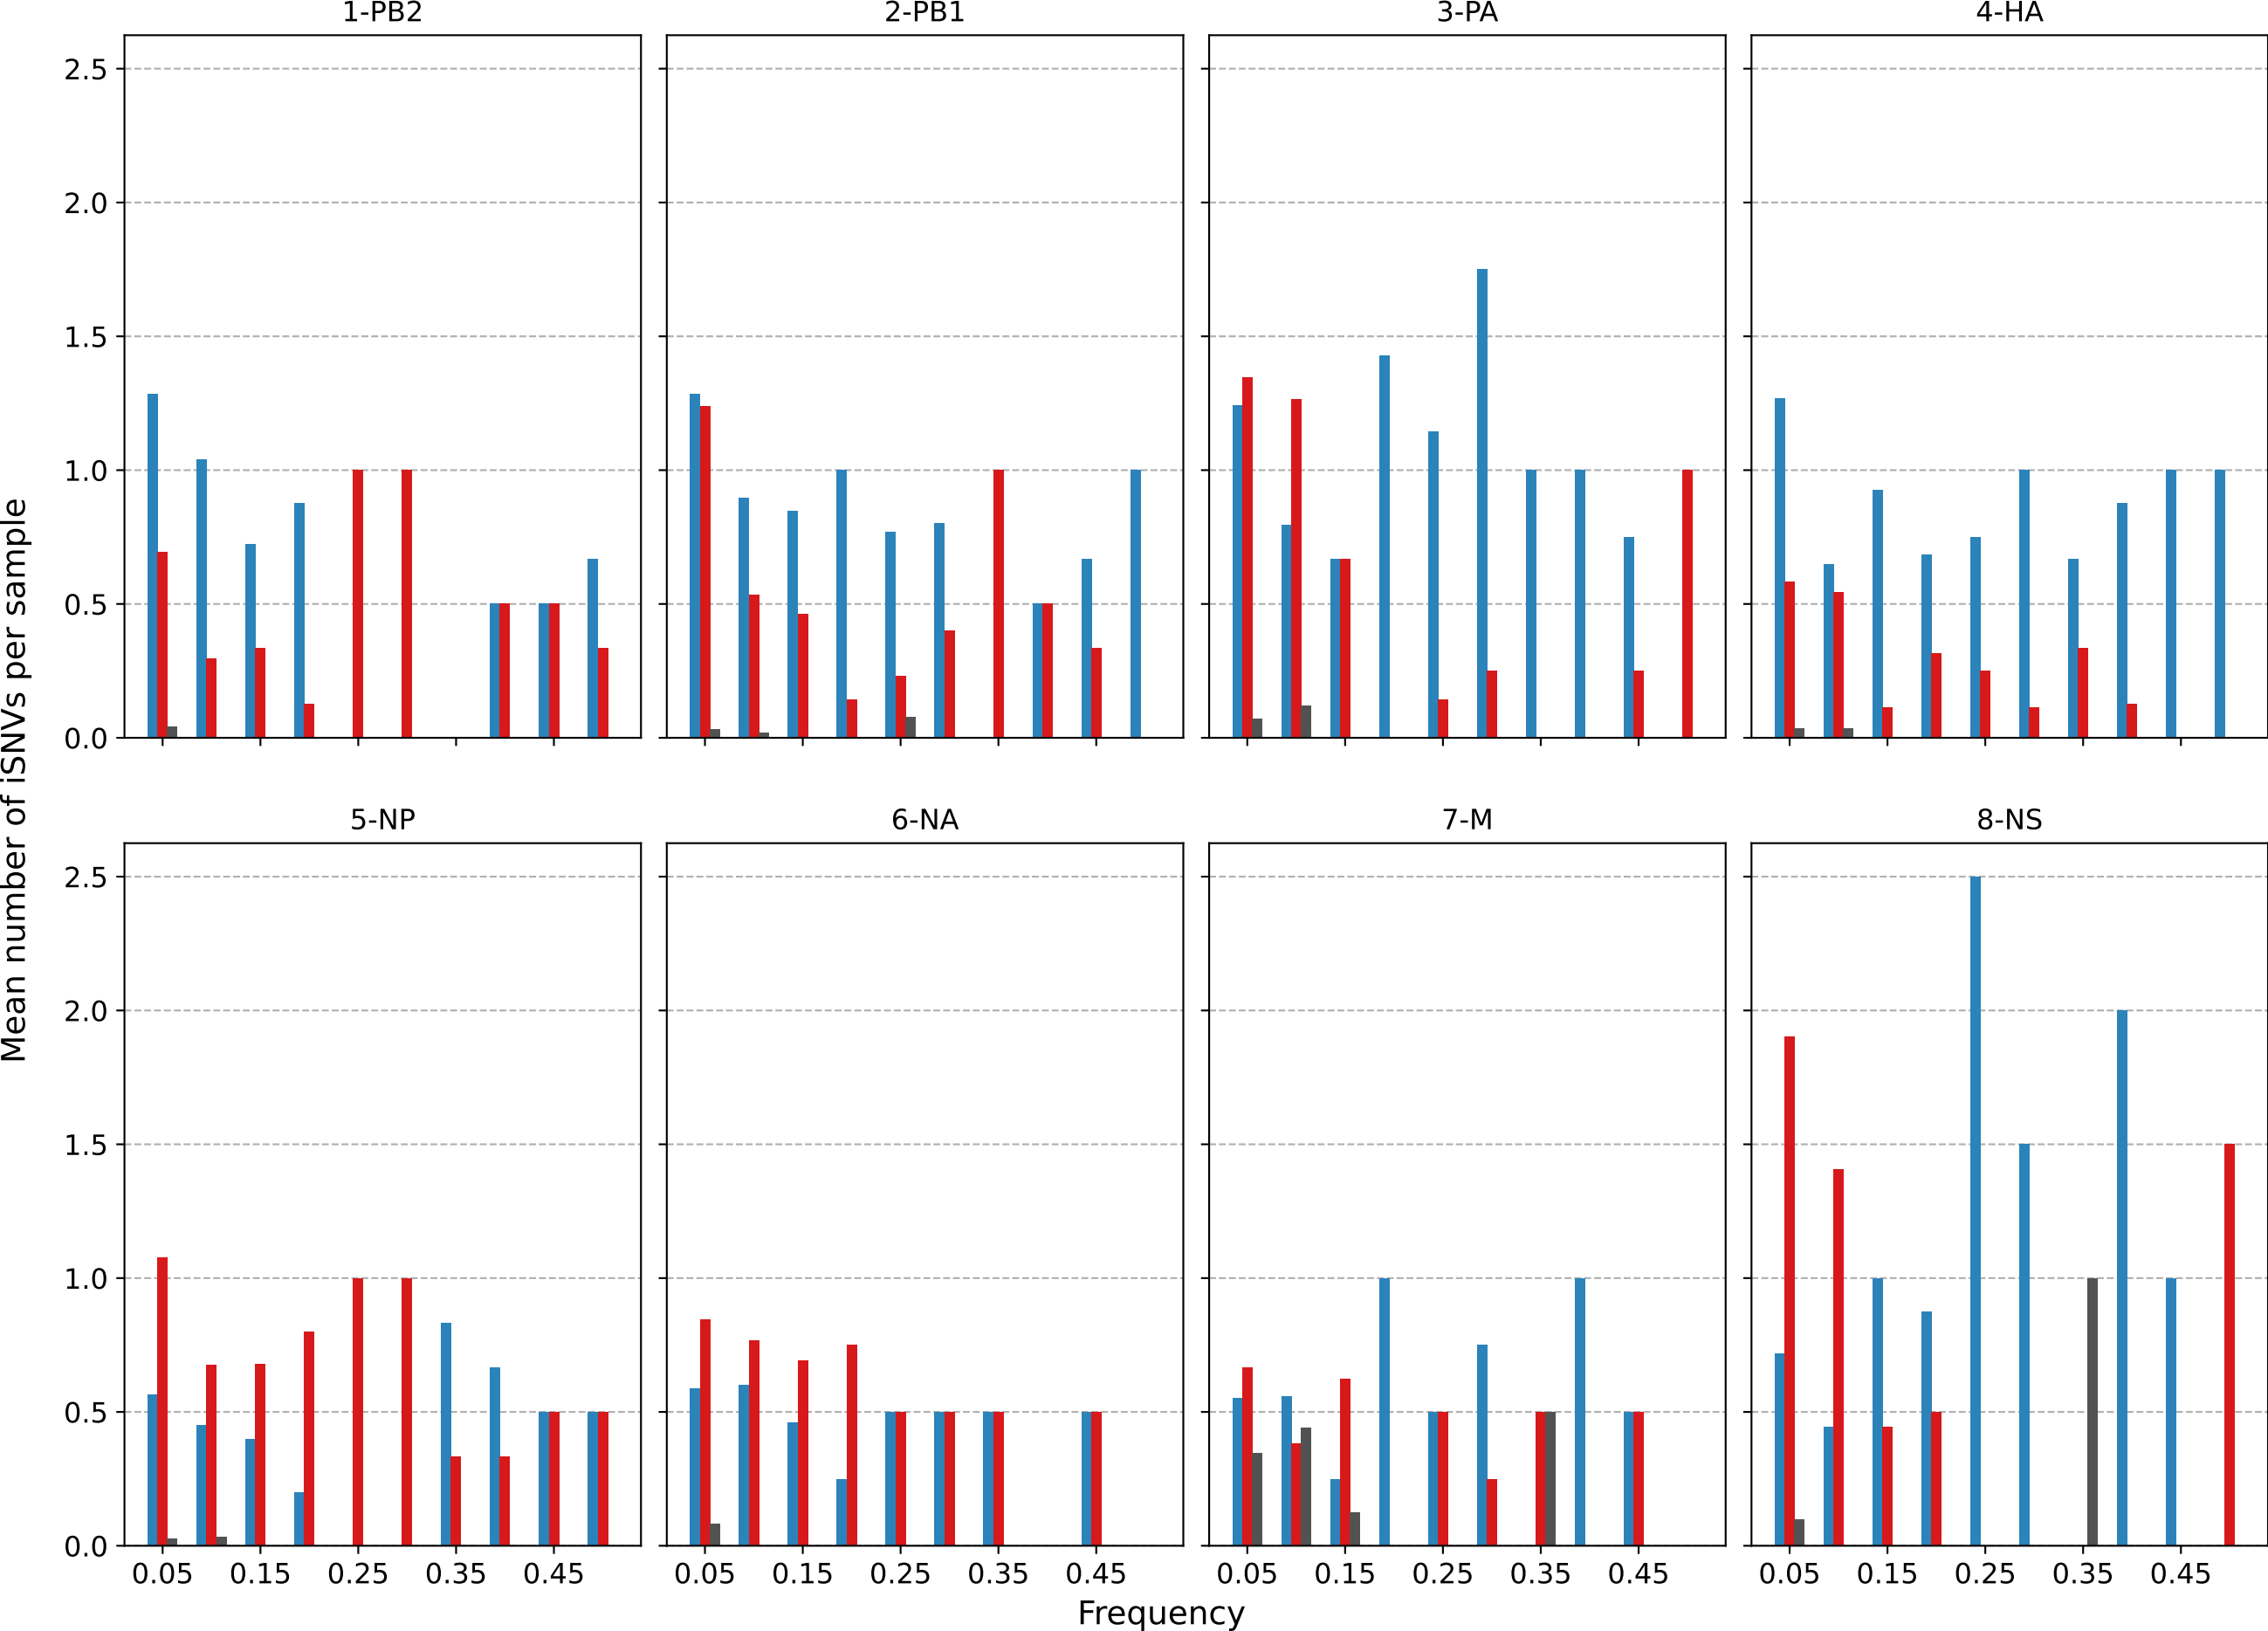

Supplement: supp [file elife_poa_e68917_Figure_3_figure_supplement_1.pdf › elife_poa_e68917_Figure_3_figure_supplement_1.pdf]

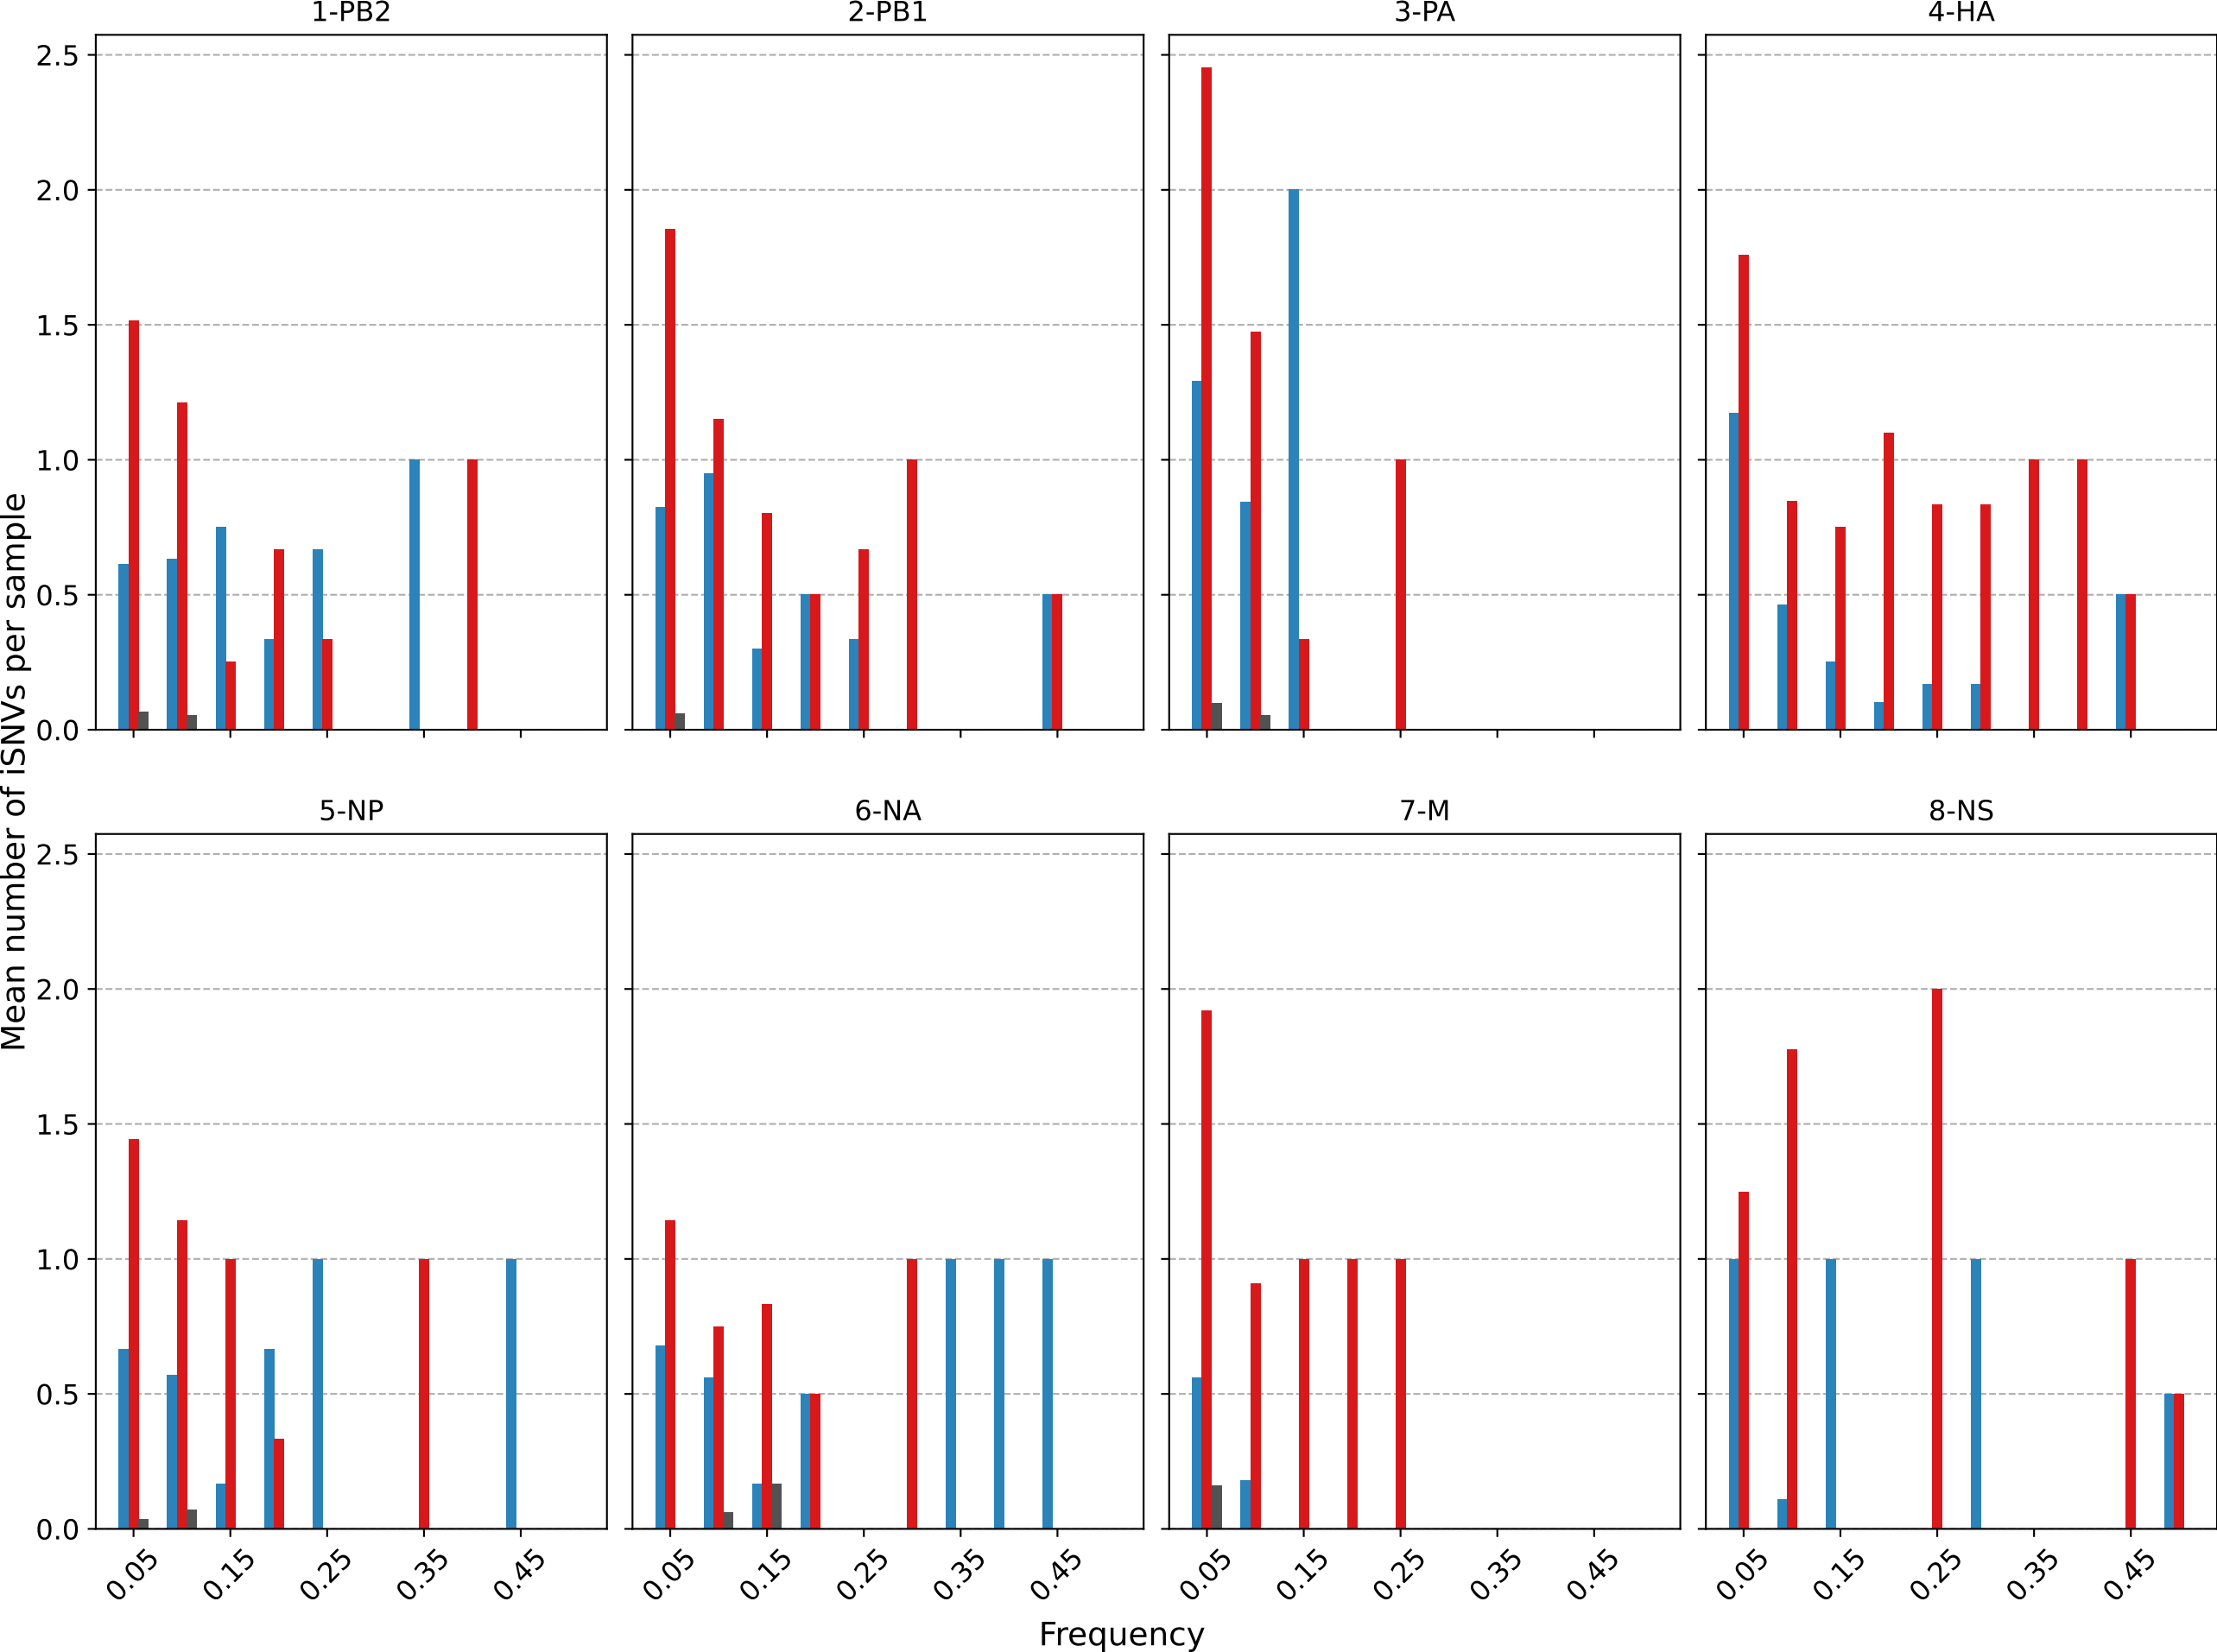

Supplement: supp [file elife_poa_e68917_Figure_3_figure_supplement_2.pdf › elife_poa_e68917_Figure_3_figure_supplement_2.pdf]

HA

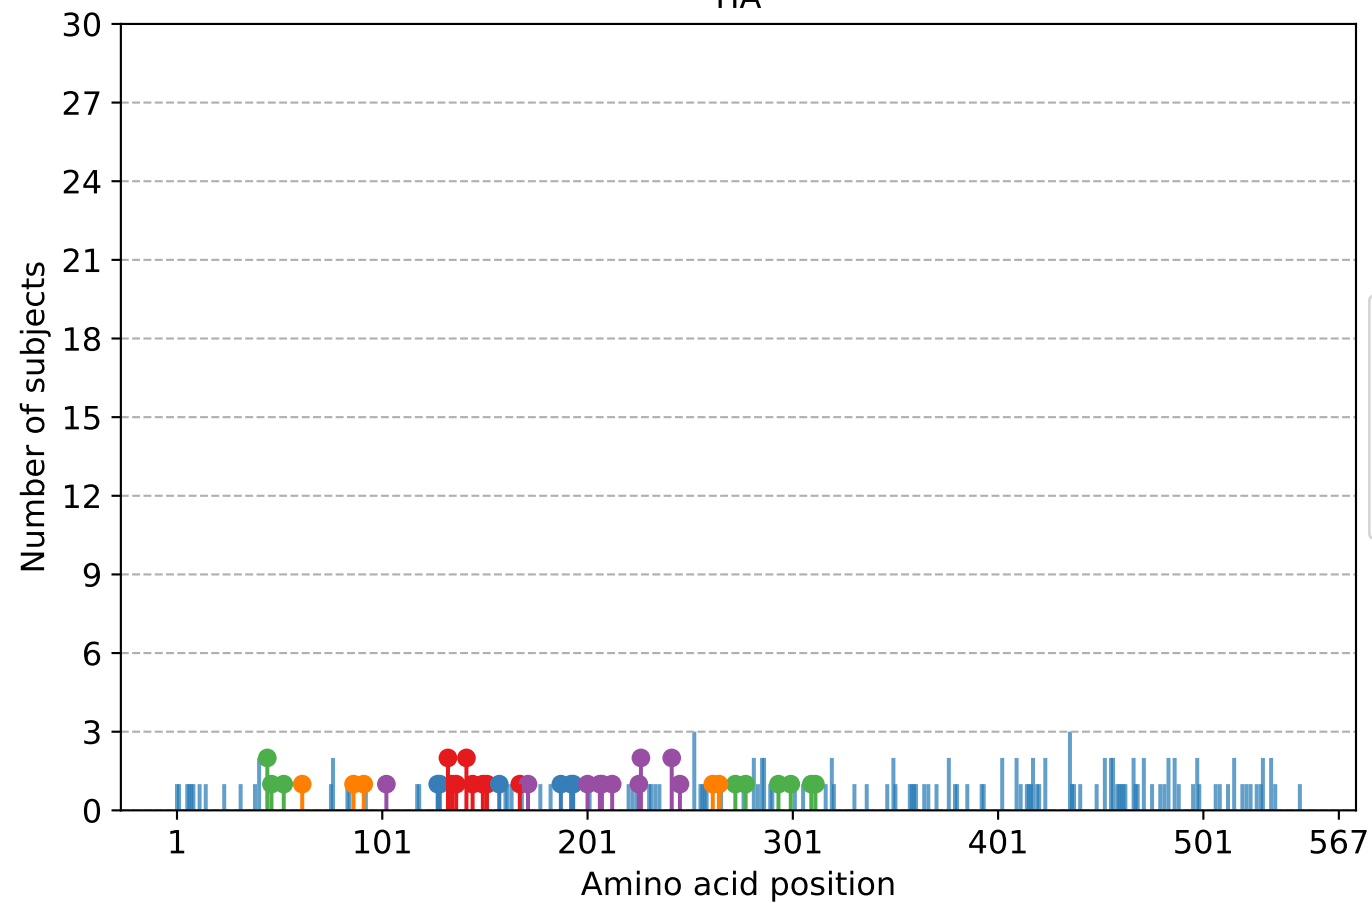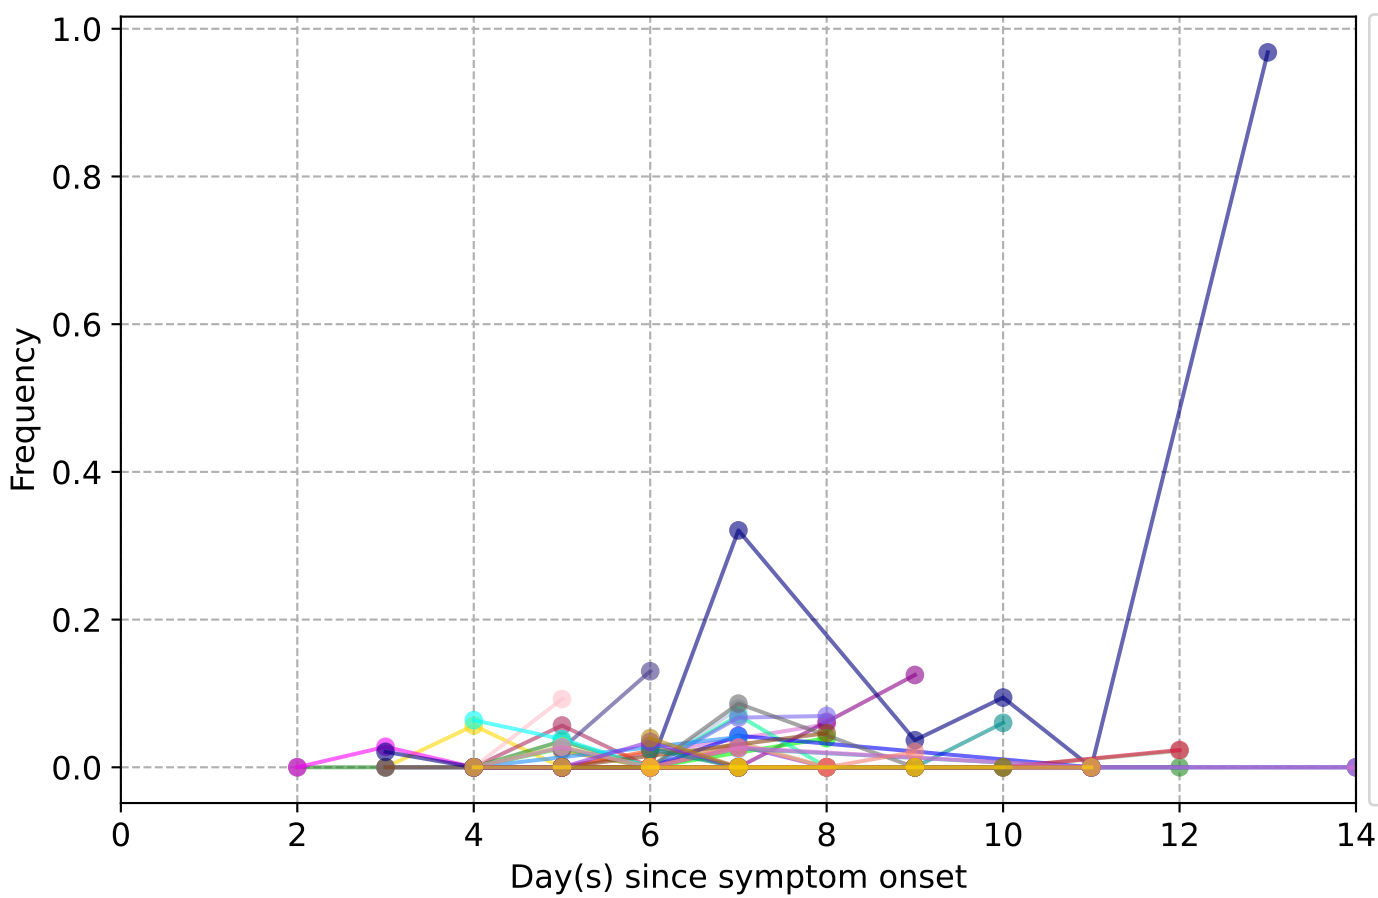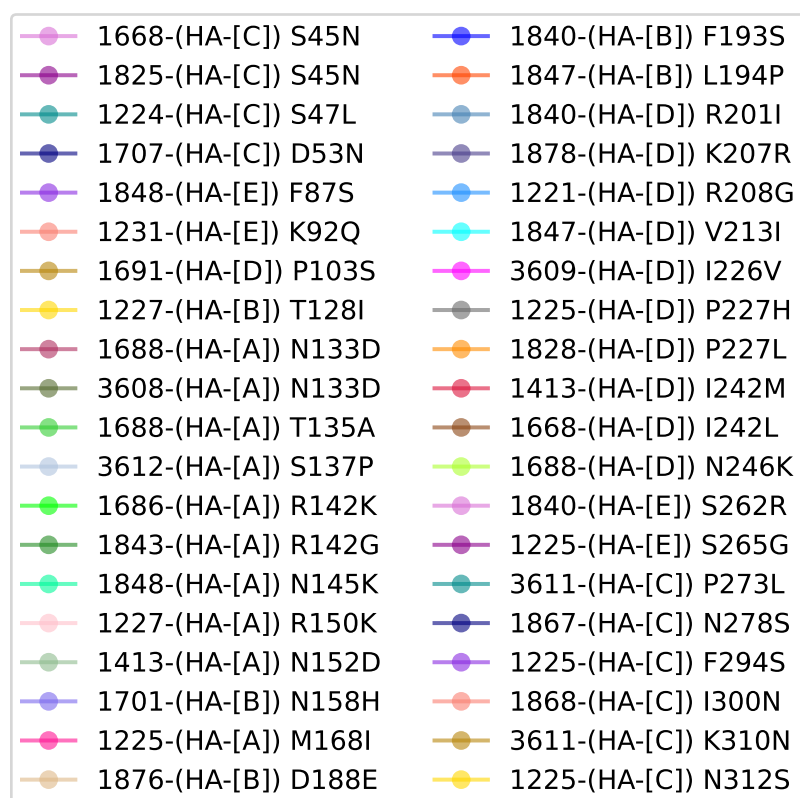

Supplement: supp [file elife_poa_e68917_Figure_4_figure_supplement_1.pdf › elife_poa_e68917_Figure_4_figure_supplement_1.pdf]

NP

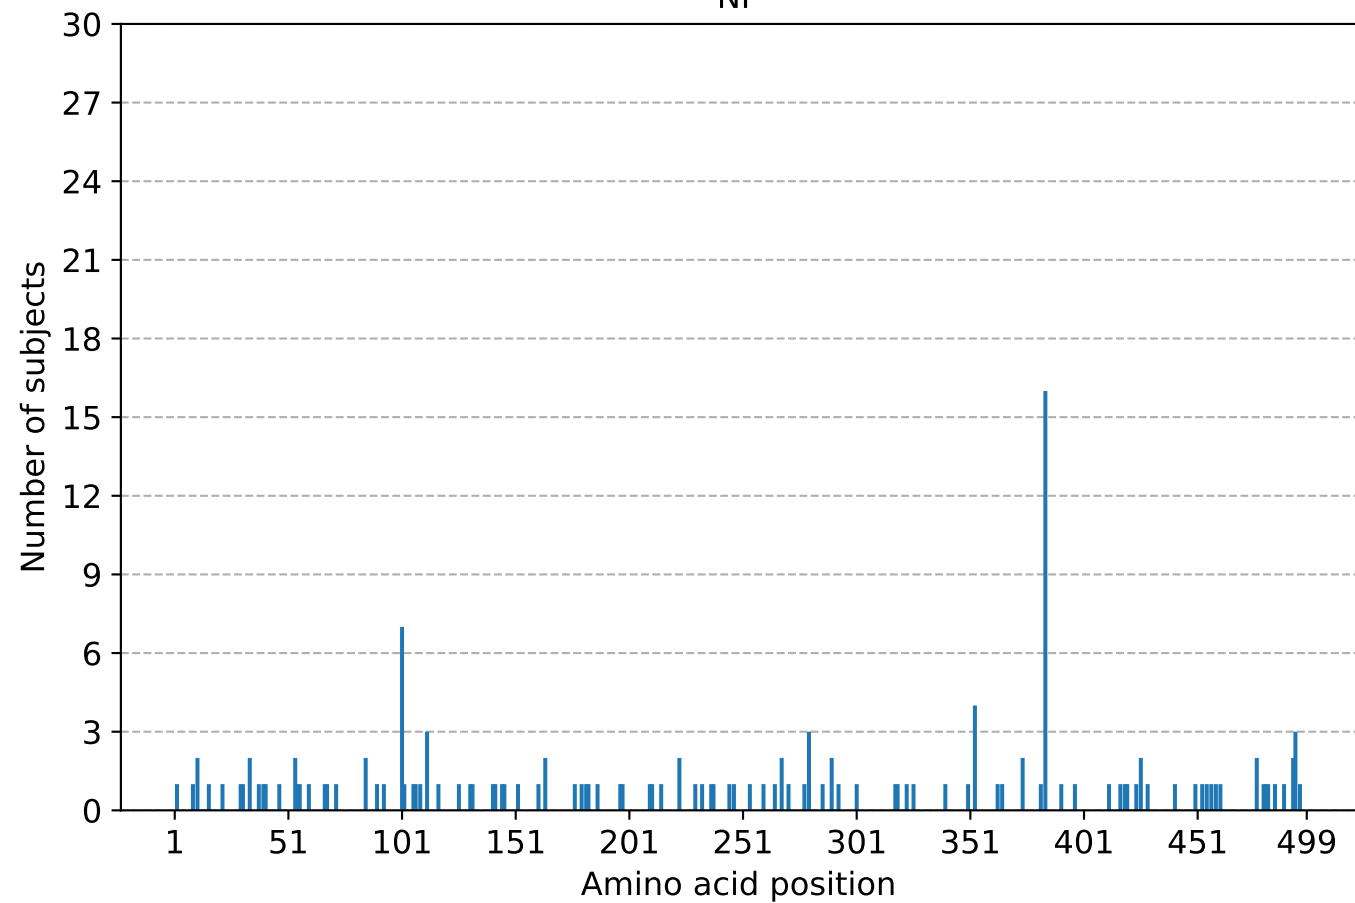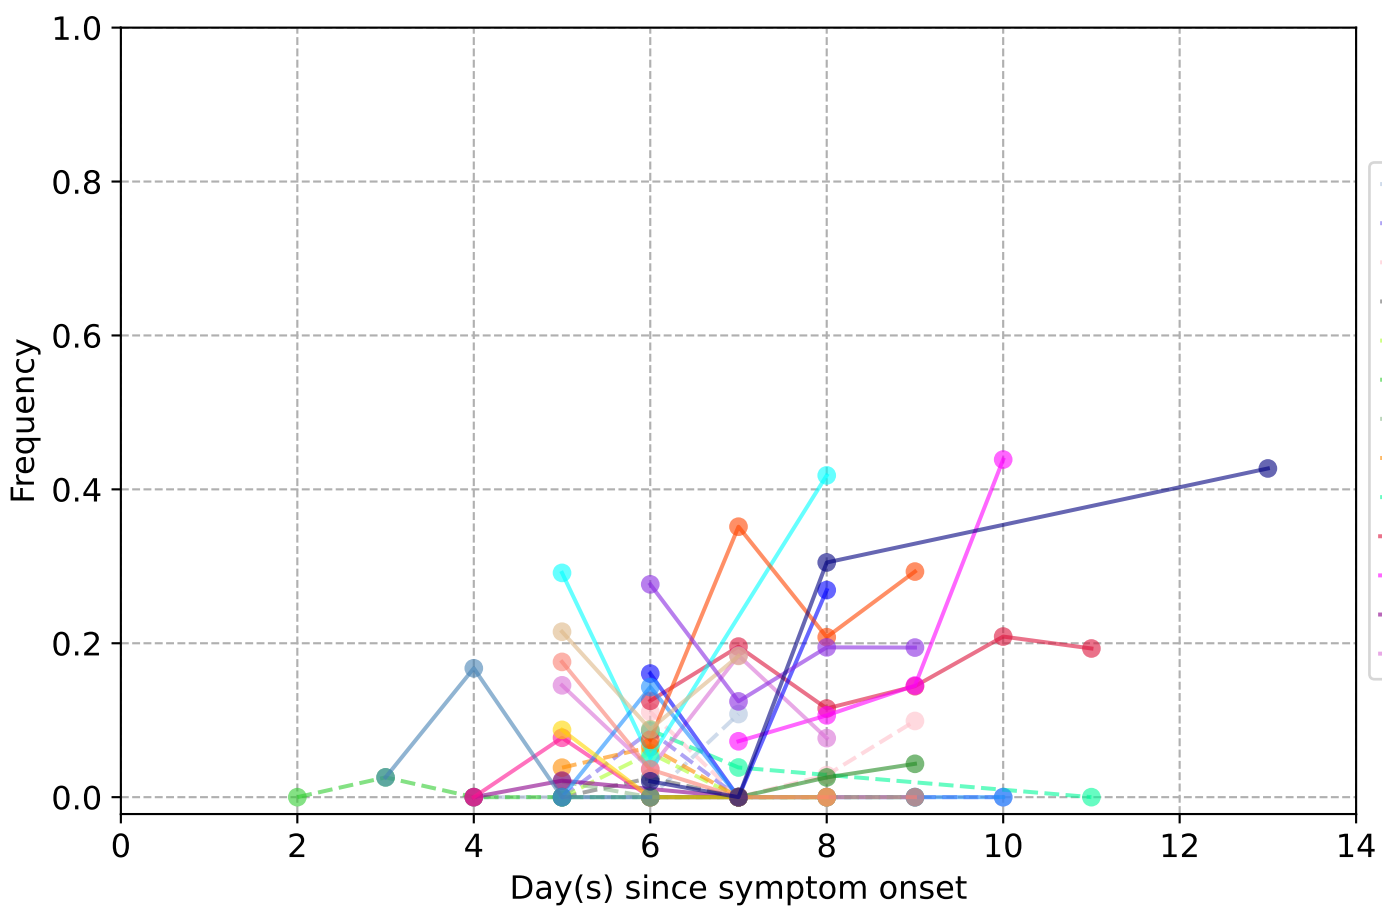

Supplement: supp [file elife_poa_e68917_Figure_4_figure_supplement_3.pdf › elife_poa_e68917_Figure_4_figure_supplement_3.pdf]

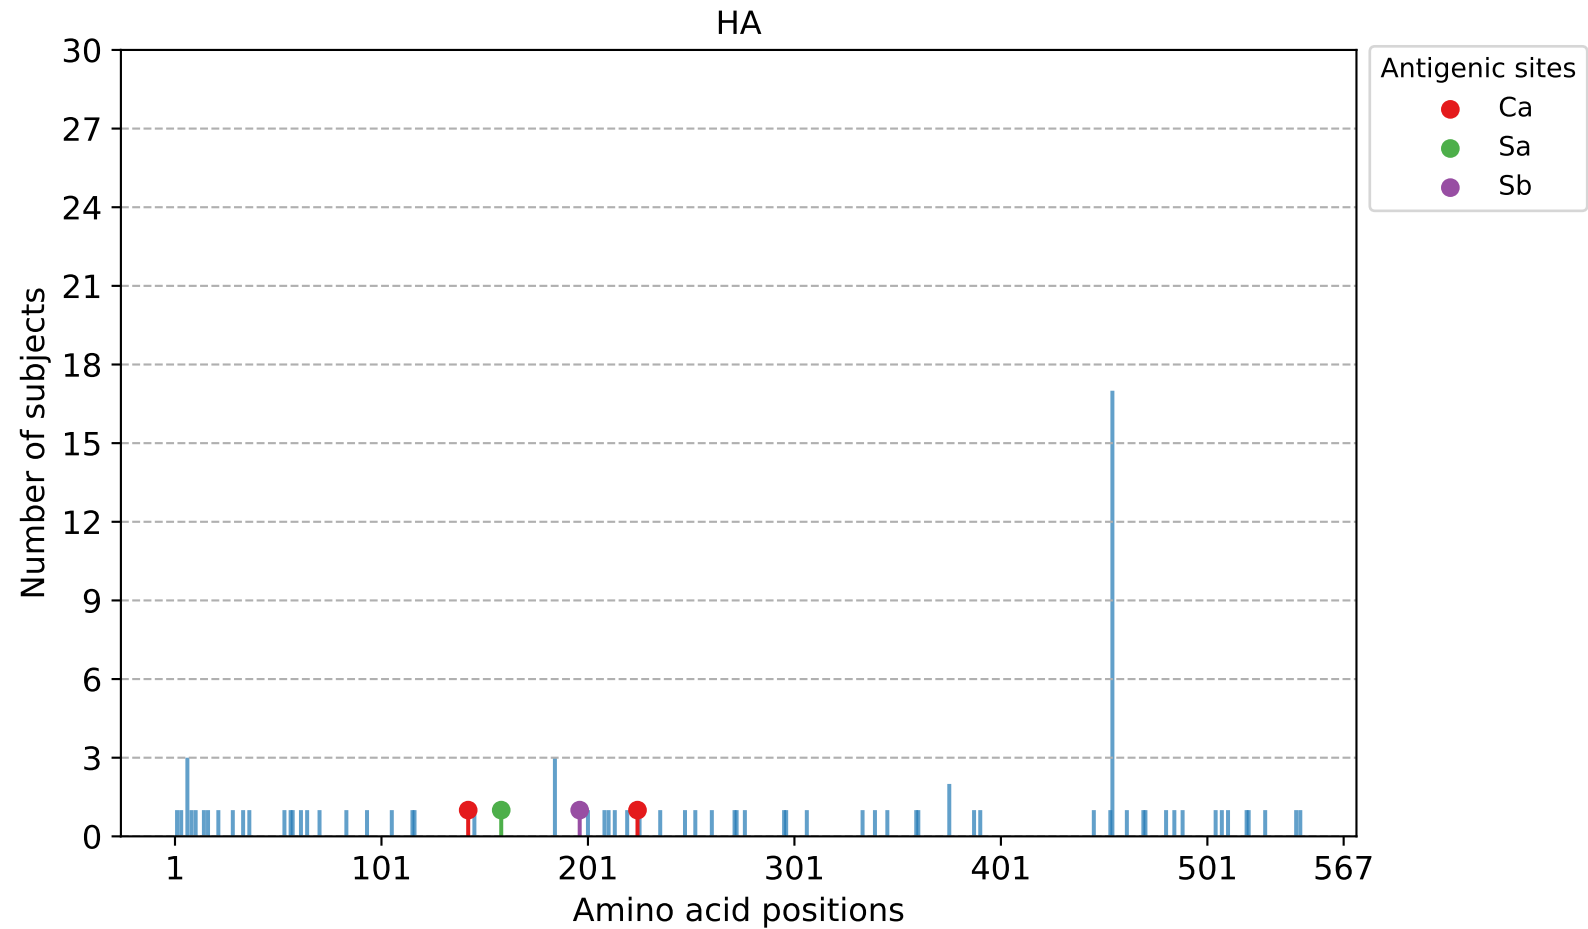

Supplement: supp [file elife_poa_e68917_Figure_4_figure_supplement_5.pdf › elife_poa_e68917_Figure_4_figure_supplement_5.pdf]

NA

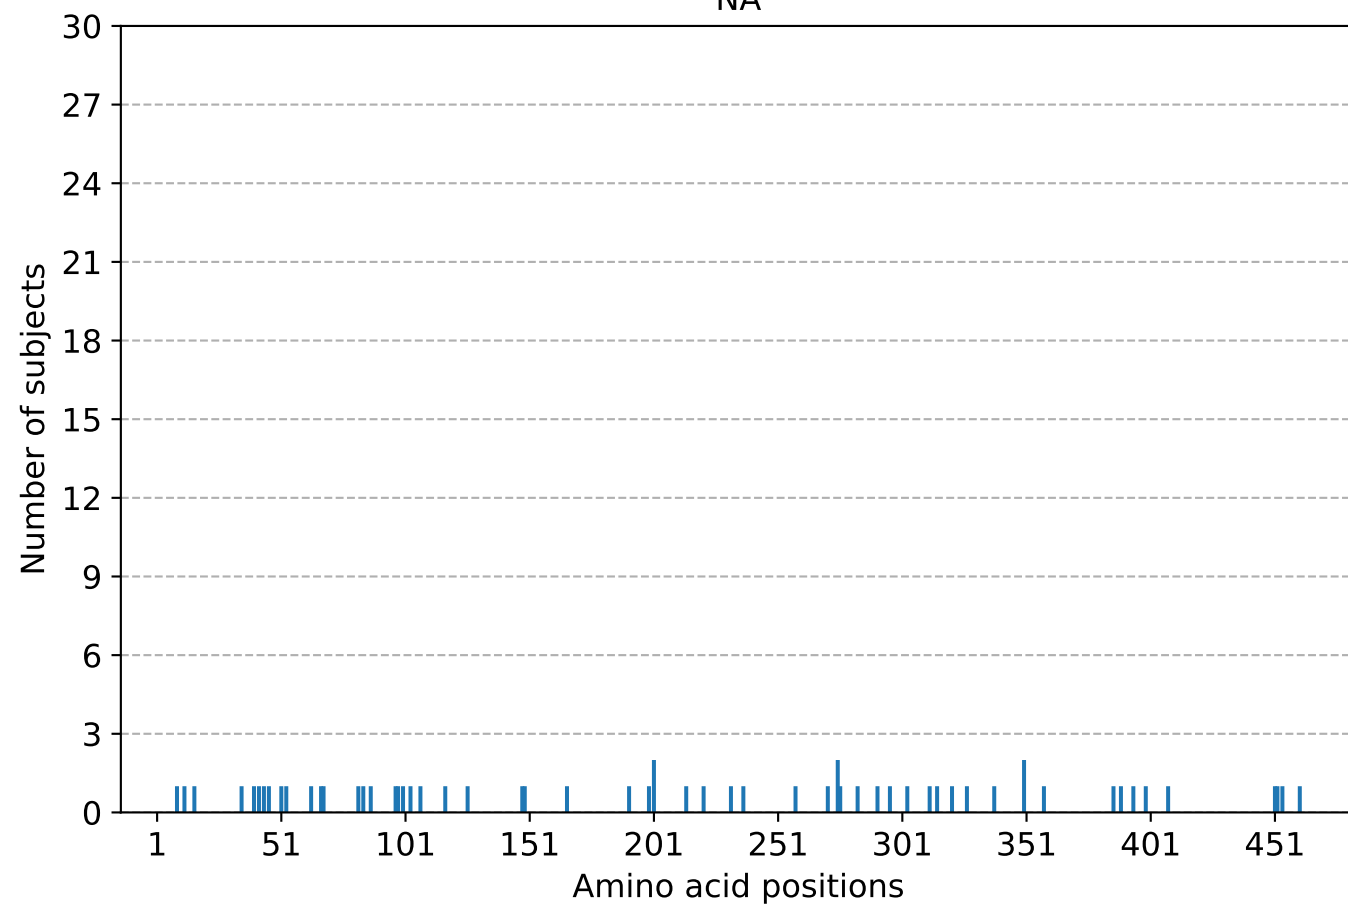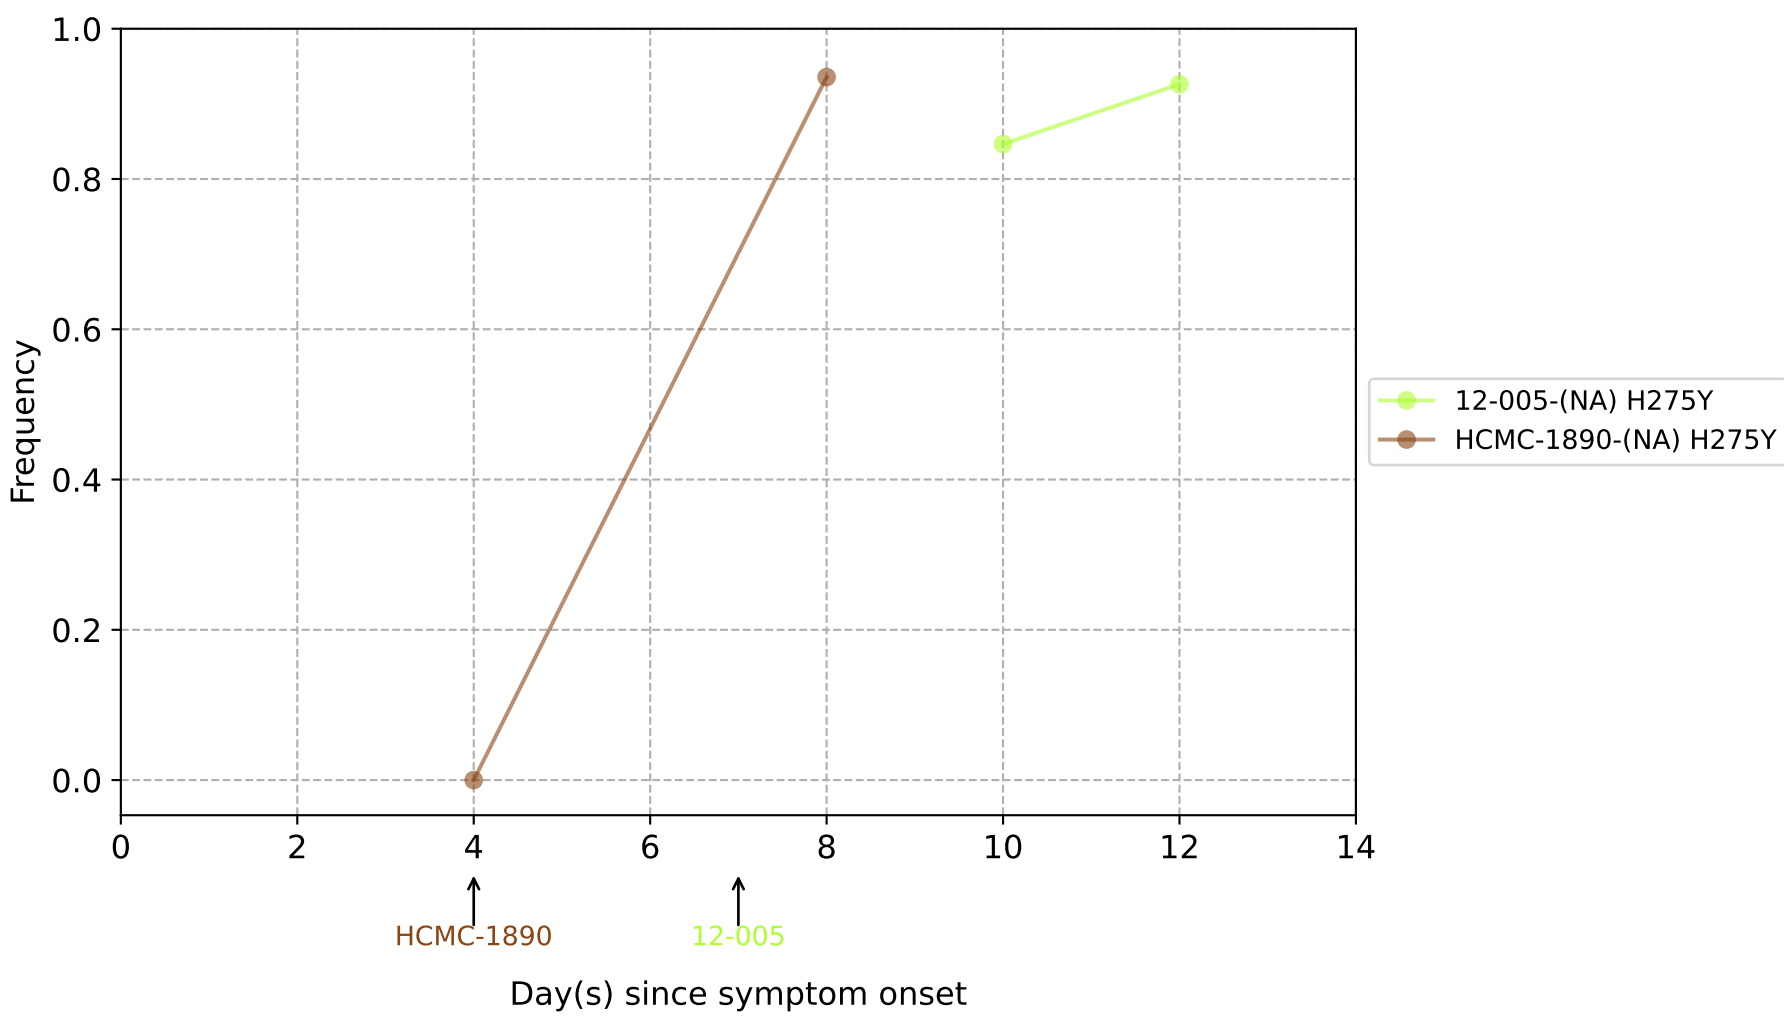

Supplement: supp [file elife_poa_e68917_Figure_4_figure_supplement_6.pdf › elife_poa_e68917_Figure_4_figure_supplement_6.pdf]

M2

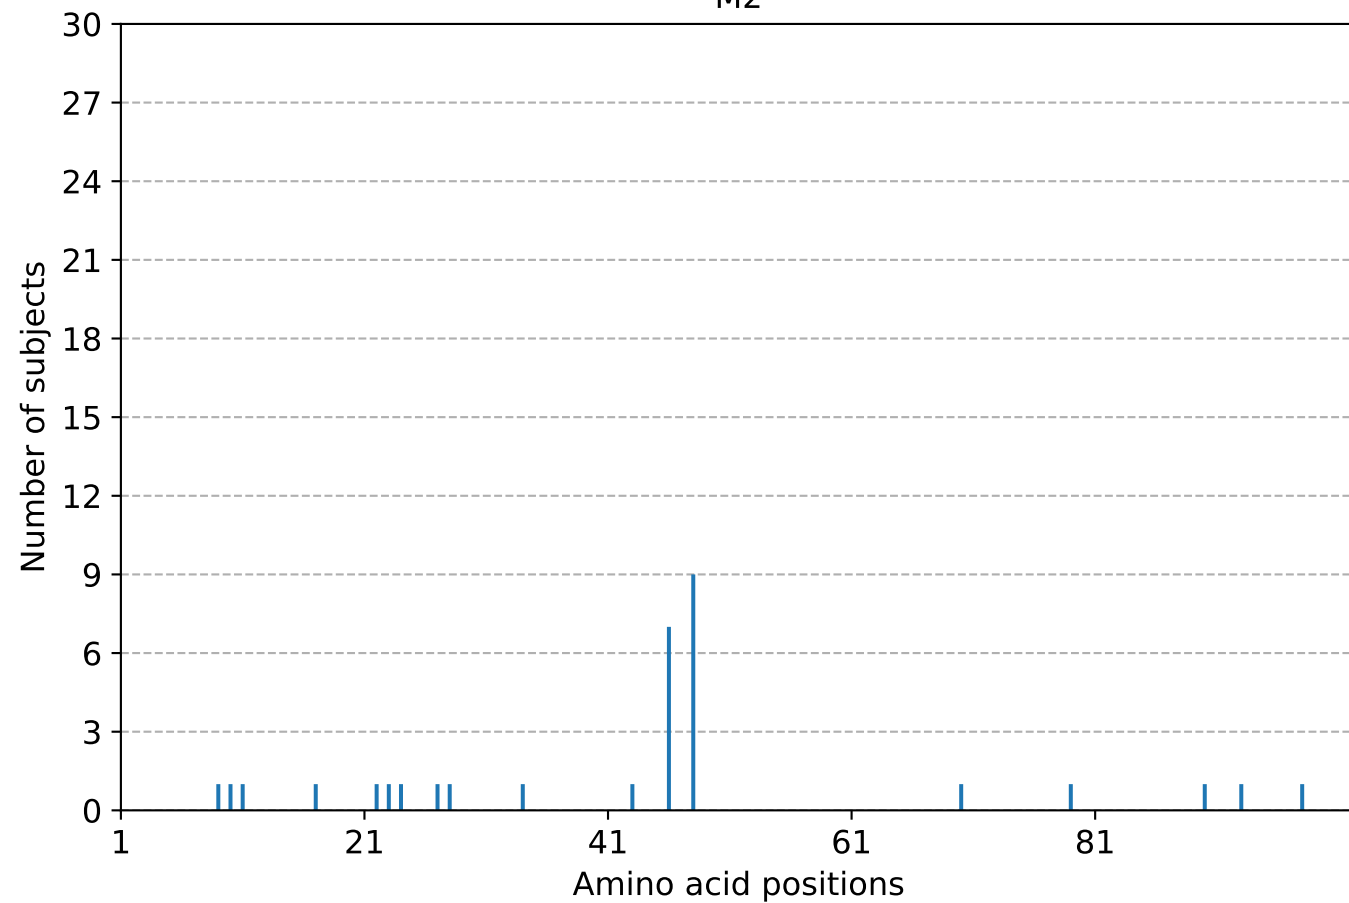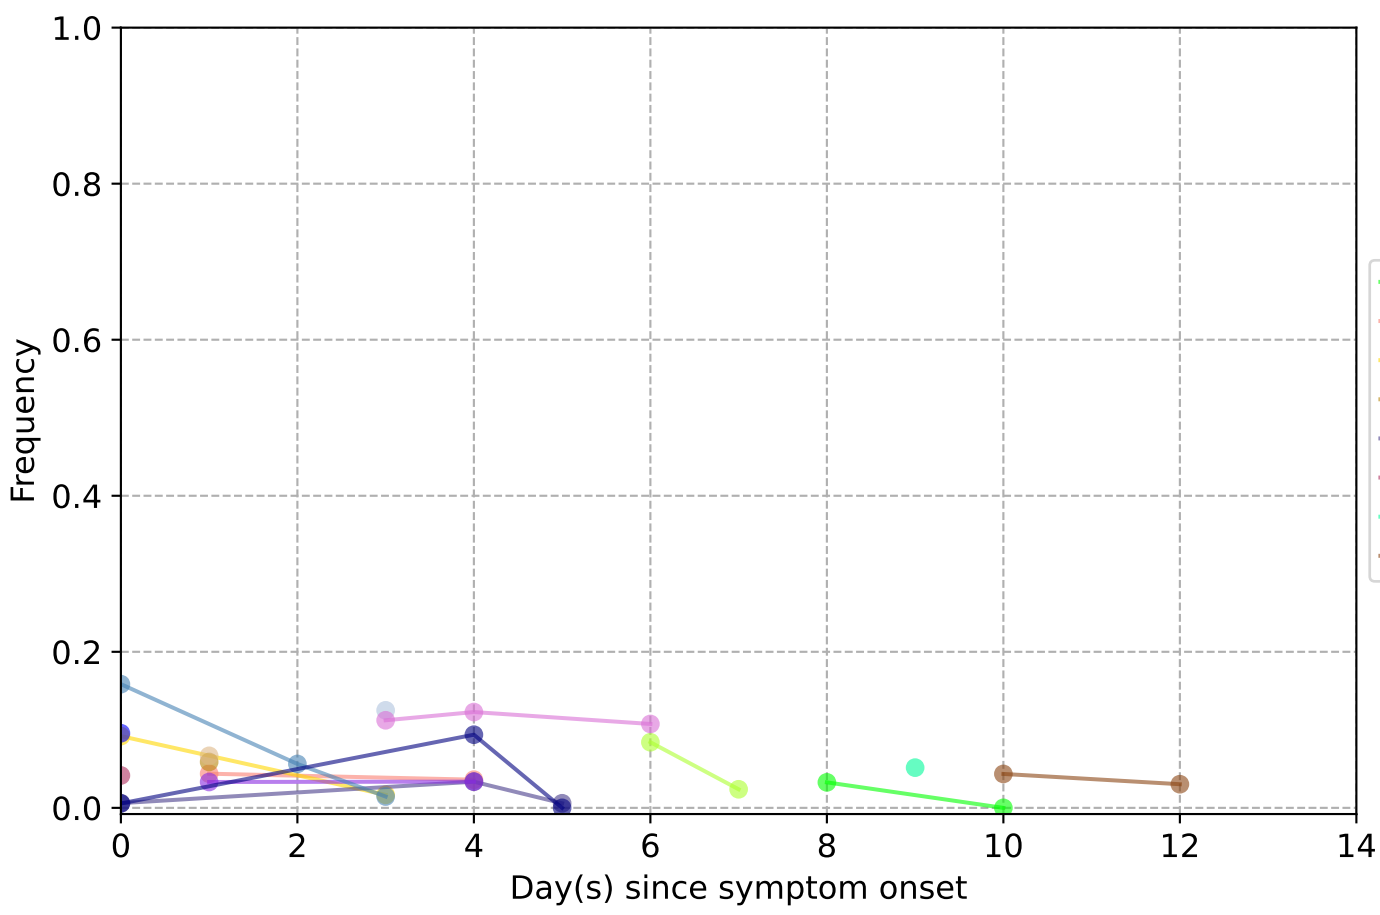

Supplement: supp [file elife_poa_e68917_Figure_4_figure_supplement_7.pdf › elife_poa_e68917_Figure_4_figure_supplement_7.pdf]

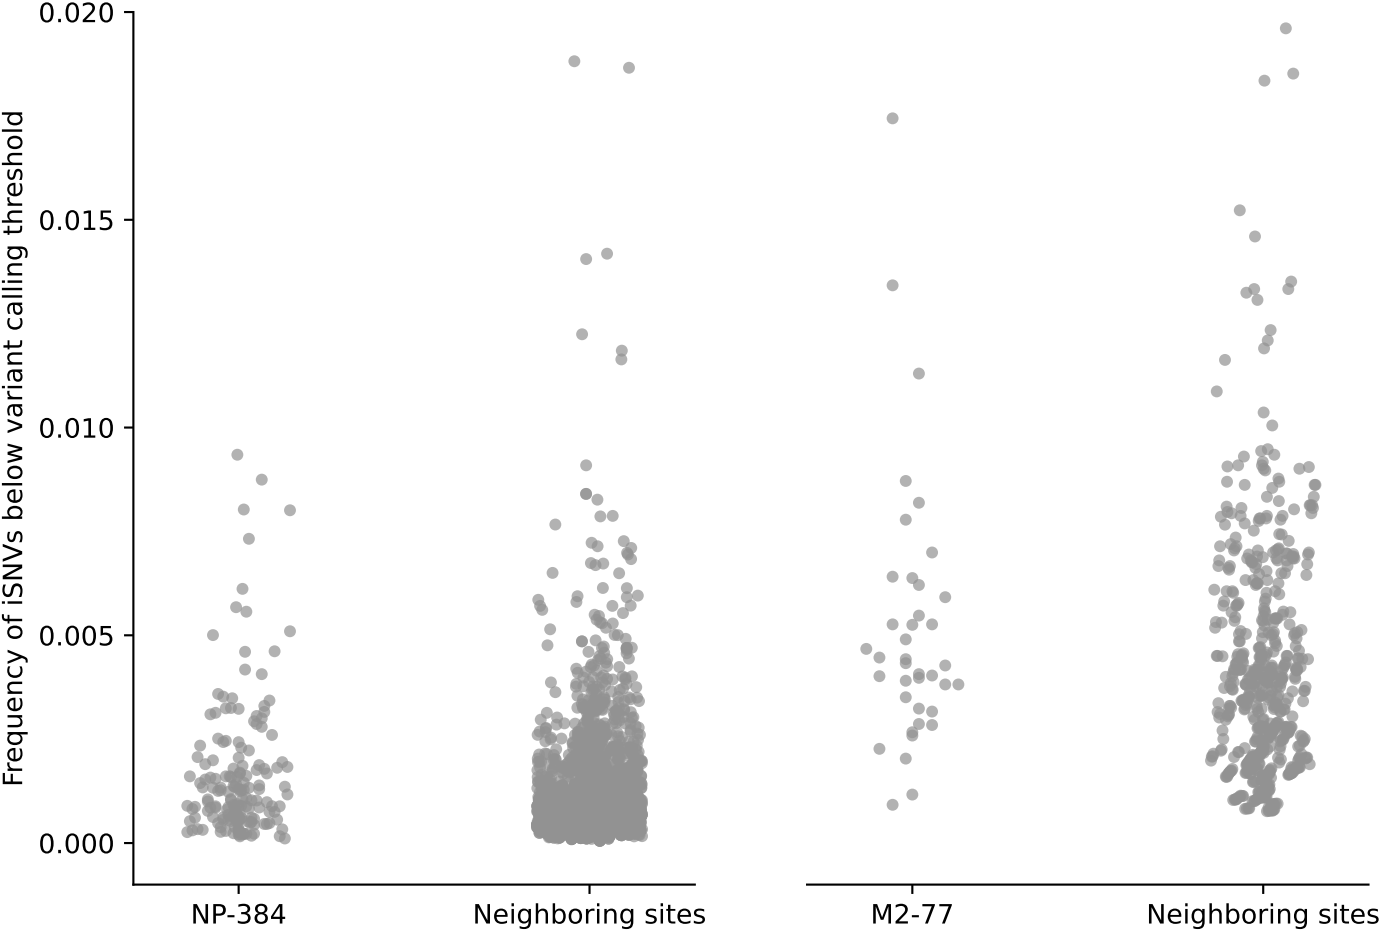

Supplement: supp [file elife_poa_e68917_Figure_4_figure_supplement_8.pdf › elife_poa_e68917_Figure_4_figure_supplement_8.pdf]

NP-G384R

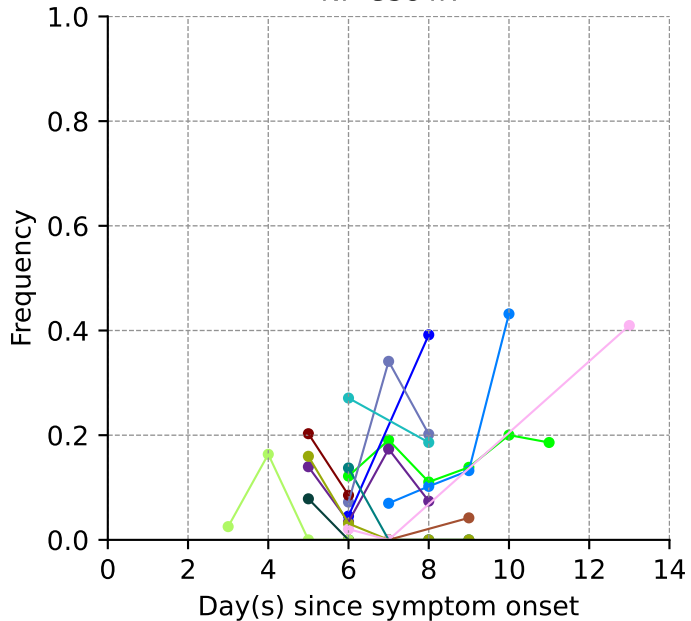

M2-R77\*

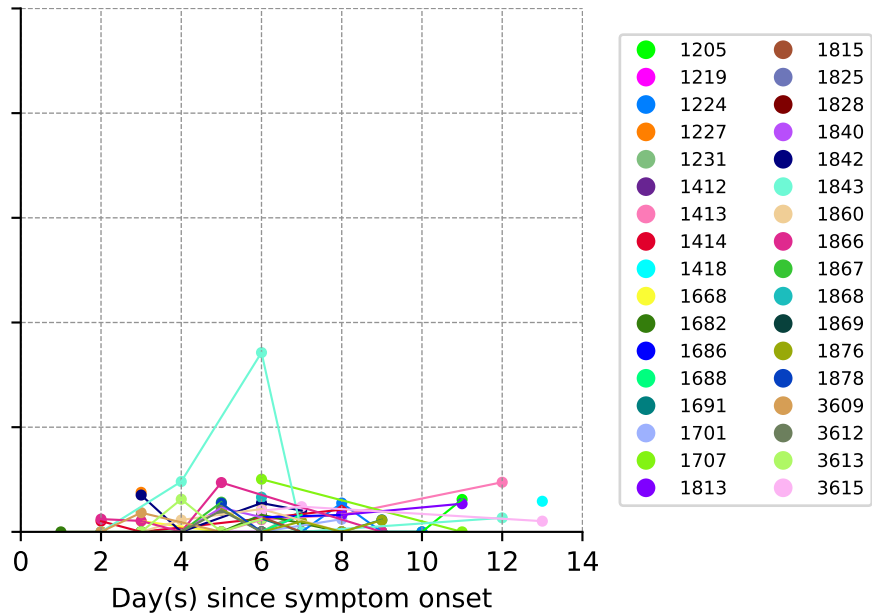

Supplement: supp [file elife_poa_e68917_Figure_4_figure_supplement_9.pdf › elife_poa_e68917_Figure_4_figure_supplement_9.pdf]

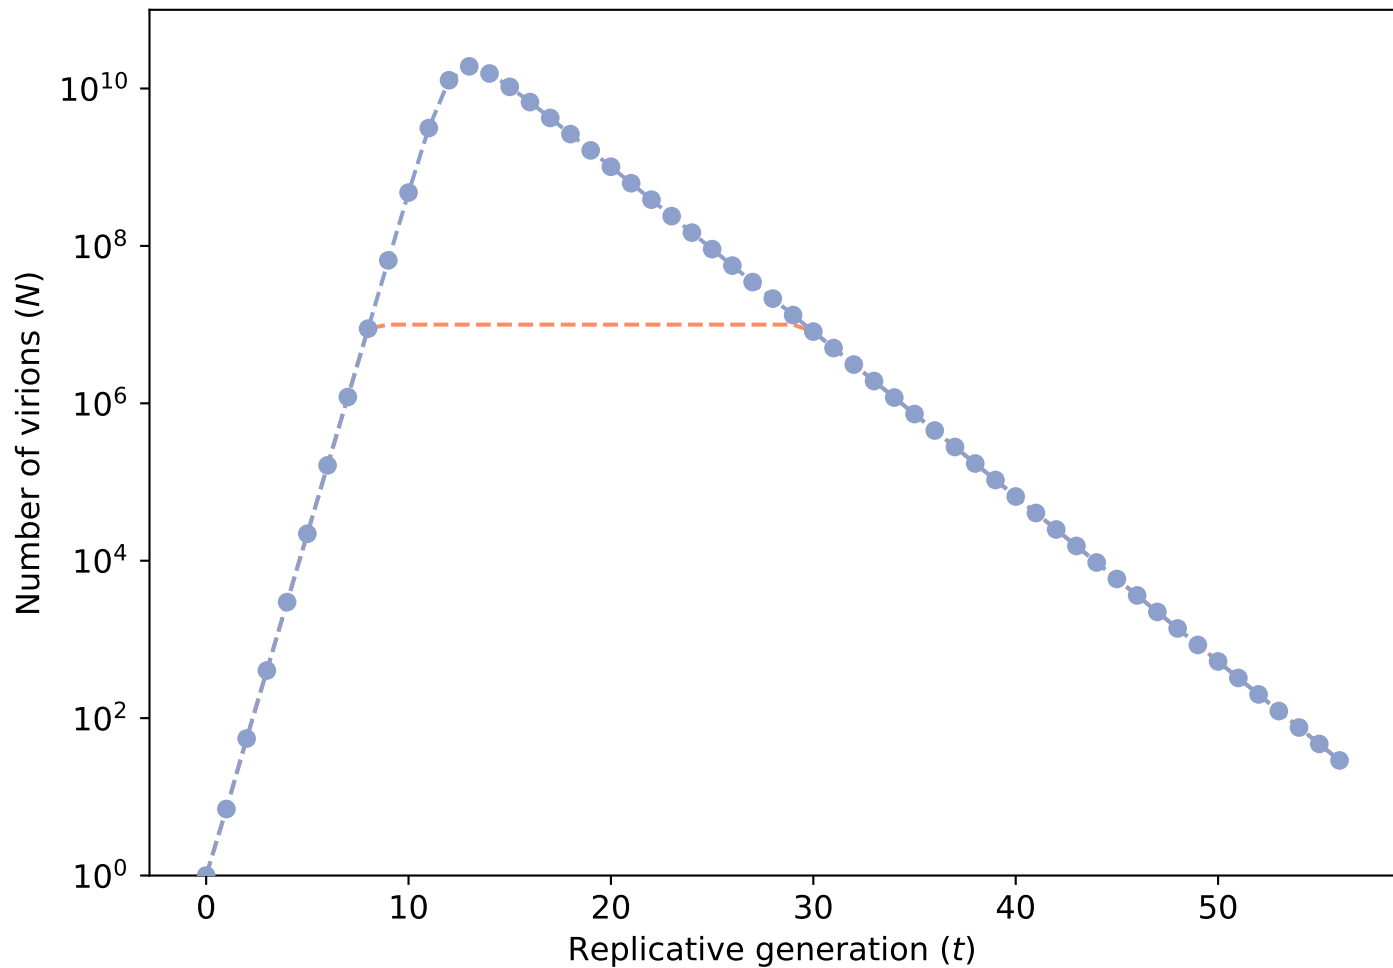

Supplement: supp [file elife_poa_e68917_Figure_6_figure_supplement_1.pdf › elife_poa_e68917_Figure_6_figure_supplement_1.pdf]
